# Supplementary material for: Bilateral JNK activation is a hallmark of interface surveillance and promotes elimination of aberrant cells
Source: eLife. 2023 Feb 6;12:e80809. doi: 10.7554/eLife.80809 (PMC9917460; doi:10.7554/eLife.80809)
Supplement: Figure 1—figure supplement 3—source data 1. [file elife-80809-fig1-figsupp3-data1.xlsx]

## Sheet: FigS1.3A
Area	Dcp1 area [%]
405.808	6.789
509.863	0.773
2299.68	5.81
192.608	1.718
230.957	2.109
1140.21	5.382
413.559	4.831
490.255	6.329
175.661	5.377
169.935	35.745
217.306	0.741
240.558	3.629
203.02	17.636
317.717	17.289
169.414	6.573
388.976	4.094
274.973	13.779
570.364	8.031
2532.19	5.865
560.705	4.483
151.021	15.791
430.969	2.333
1305.34	3.012
261.265	4.162
2972.88	4.666
218.926	8.731
465.21	4.984
332.062	4.849
209.613	16.08
591.707	2.746
203.829	28.925
485.859	10.512
283.533	2.274
1035.4	3.736
628.436	2.458
319.857	8.241
558.391	4.206
446.585	0.591
38.522	49.448
69.698	15.699
37.018	10.058
65.591	27.056
90.925	4.979
90	1.548
83.348	25.403
49.454	22.659
104.344	22.71
55.7	33.481
25.565	26.918
21.401	57.426
122.969	12.078
121.754	50.126
25.334	59.801
113.83	14.286
55.238	11.566
51.478	62.014
40.488	22.996
46.272	53.783
58.072	25.473
81.497	5.153
108.161	10.857
66.979	3.575
39.678	14.07
38.522	6.847
71.028	39.235
22.269	75.872
26.664	5.28
21.054	30.918
91.677	2.635
93.065	17.574
108.509	20.431
35.514	50.371
75.829	18.744
28.805	86.012
26.028	31.878
75.597	23.235
129.62	8.179
28.573	42.606
45.115	12.565
54.37	25.754
12.204	74.23
112.731	8.181
135.231	6.522
267.049	22.439
82.191	15.667
32.391	15.856
21.806	17.206
89.421	5.901
	Dcp1 area [%]
Semilog line
Best-fit values
Slope	-22.09
Yintercept	65.01
95% CI (profile likelihood)
Slope	-28,17 to -16,02
Yintercept	51,72 to 78,30
Hougaard's Measure of Skewness
Slope	0
Yintercept	0
Goodness of Fit
Degrees of Freedom	86
R squared	0.378
Adjusted R squared	0.3707
Sum of Squares	19395
Sy.x	15.02
RMSE	14.93
AICc	481.1
Normality of Residuals
Kolmogorov-Smirnov (distance)	0.1293
P value	<0,001
Passed normality test (alpha=0.05)?	No
P value summary	***
Covariance Matrix
Slope & Yintercept	-0.9709
Dependency
Slope	0.9426
Yintercept	0.9426
Number of points
# of X values	88
# Y values analyzed	88
	Area vs. Dcp1 area [%]
Spearman r
r	-0.675
95% confidence interval	-0,7774 to -0,5377
P value
P (two-tailed)	<0,001
P value summary	***
Exact or approximate P value?	Approximate
Significant? (alpha = 0.05)	Yes
Number of XY Pairs	88
