# Supplementary material for: Bilateral JNK activation is a hallmark of interface surveillance and promotes elimination of aberrant cells
Source: eLife. 2023 Feb 6;12:e80809. doi: 10.7554/eLife.80809 (PMC9917460; doi:10.7554/eLife.80809)
Supplement: Figure 1—figure supplement 3—source data 2. [file elife-80809-fig1-figsupp3-data2.xlsx]

## Sheet: FigS1.3E
	wildtype tissue	Eyeless clones
wing disc1	1.184	19.595
wing disc2	1.553	17.478
wing disc3	1.722	15.246
wing disc4	1.624	21.194
wing disc5	1.474	18.791
wing disc6	0.306	1.976
wing disc7	0.279	7.373
wing disc8	0.283	6.858
wing disc9	1.154	19.384
wing disc10	0.486	6.752
Column B	Eyeless clones
vs.	vs,
Column A	wildtype tissue
Paired t test
P value	<0,001
P value summary	***
Significantly different (P < 0.05)?	Yes
One- or two-tailed P value?	Two-tailed
t, df	t=6,110, df=9
Number of pairs	10
	Background	Eyeless clones	Eyeless clones - Background
Number of values	10	10	10
Minimum	0.279	1.976	1.67
25% Percentile	0.3003	6.832	6.498
Median	1.169	16.36	14.72
75% Percentile	1.571	19.44	18.28
Maximum	1.722	21.19	19.57
Mean	1.007	13.46	12.46
Std. Deviation	0.6035	6.975	6.448
Std. Error of Mean	0.1908	2.206	2.039
Lower 95% CI	0.5748	8.475	7.845
Upper 95% CI	1.438	18.45	17.07
