# Supplementary material for: Bilateral JNK activation is a hallmark of interface surveillance and promotes elimination of aberrant cells
Source: eLife. 2023 Feb 6;12:e80809. doi: 10.7554/eLife.80809 (PMC9917460; doi:10.7554/eLife.80809)
Supplement: Figure 1—figure supplement 3—source data 3. [file elife-80809-fig1-figsupp3-data3.xlsx]

## Sheet: FigS1.3F
	apical									basal
wildtype	4	5	7	8	5	4	6	6	4	4	5	7	7	5	4	6	6	4
p35	5	9	8	8	8	6	10	6	8	5	9	8	8	9	6	11	6	8
ey	4	15	8	9	17	5	3	3	3	6	17	13	12	21	7	7	4	4
ey p35	12	10	9	11	3	5	6	7	3	12	8	9	10	3	3	6	7	3
Alpha	0.05
Šídák's multiple comparisons test	Mean Diff,	95,00% CI of diff,	Below threshold?	Summary	Adjusted P Value
apical - basal
wildtype	0.1111	-0,6612 to 0,8834	No	ns	>0,99
p35	-0.2222	-0,9945 to 0,5501	No	ns	0.91
ey	-2.667	-3,439 to -1,894	Yes	***	<0,001
ey p35	0.5556	-0,2167 to 1,328	No	ns	0.24
Test details	Mean 1	Mean 2	Mean Diff,	SE of diff,	N1	N2	t	DF
apical - basal
wildtype	5.444	5.333	0.1111	0.2927	9	9	0.3797	32
p35	7.556	7.778	-0.2222	0.2927	9	9	0.7593	32
ey	7.444	10.11	-2.667	0.2927	9	9	9.112	32
ey p35	7.333	6.778	0.5556	0.2927	9	9	1.898	32
	apical	basal
Number of values	4	4
Minimum	5.444	5.333
25% Percentile	5.917	5.694
Median	7.389	7.278
75% Percentile	7.528	9.528
Maximum	7.556	10.11
Mean	6.944	7.5
Std. Deviation	1.004	2.009
Std. Error of Mean	0.5021	1.005
Lower 95% CI of mean	5.347	4.303
Upper 95% CI of mean	8.542	10.7
