# Supplementary material for: Bilateral JNK activation is a hallmark of interface surveillance and promotes elimination of aberrant cells
Source: eLife. 2023 Feb 6;12:e80809. doi: 10.7554/eLife.80809 (PMC9917460; doi:10.7554/eLife.80809)
Supplement: Figure 1—source data 1. [file elife-80809-fig1-data1.xlsx]

## Sheet: Fig 1Q
	Wildtype tissue	Forkhead clones
wing disc1	0.493	8.278
wing disc2	0.807	6.109
wing disc3	0.699	8.356
wing disc4	0.315	5.736
wing disc5	0.839	4.272
wing disc6	0.334	7.59
wing disc7	0.755	12.387
wing disc8	0.594	4.036
wing disc9	0.414	3.083
Column B	Forkhead clones
vs.	vs,
Column A	Wildtype tissue
Paired t test
P value	<,001
P value summary	***
Significantly different (P < 0.05)?	Yes
One- or two-tailed P value?	Two-tailed
t, df	t=6,422, df=8
Number of pairs	9
