# Supplementary material for: Bilateral JNK activation is a hallmark of interface surveillance and promotes elimination of aberrant cells
Source: eLife. 2023 Feb 6;12:e80809. doi: 10.7554/eLife.80809 (PMC9917460; doi:10.7554/eLife.80809)
Supplement: Figure 1—source data 2. [file elife-80809-fig1-data2.xlsx]

## Sheet: Fig 1R
10-140 µm2	140-650 µm2	650-5000 µm2
49.448	6.789	5.81
15.699	0.773	0.271
10.058	0	0.107
0	1.718	5.382
0	2.109	5.865
0.097	4.831	3.012
0	6.329	4.666
27.056	0.119	3.736
4.979	0.013
1.548	0
25.403	5.377
22.659	0.084
22.71	0.086
33.481	35.745
26.918	0.741
0	3.629
57.426	17.636
12.078	17.289
50.126	6.573
59.801	4.094
14.286	13.779
11.566	8.031
0	0.228
0	4.483
62.014	0
22.996	0.006
53.783	15.791
25.473	2.333
5.153	0.009
10.857	0.026
3.575	4.162
14.07	0
0.102	0
6.847	0
39.235	8.731
75.872	4.984
0	4.849
5.28	16.08
30.918	2.746
2.635	28.925
0	0.093
17.574	0.052
20.431	0.381
50.371	10.512
18.744	2.274
0.179	0.06
0.252	2.458
86.012	8.241
31.878	4.206
0.087	0.334
23.235	0.032
8.179	0.028
0	0.591
0	0.01
0	0.024
42.606	0
0	0
0	0
0.051	0
12.565	0
25.754	0.274
74.23	0.017
8.181	22.439
6.522
15.667
15.856
0.05
17.206
5.901
Alpha	0.05
Dunnett's T3 multiple comparisons test	Mean Diff,	95,00% CI of diff,	Below threshold?	Summary	Adjusted P Value
10-140 µm2 vs. 140-650 µm2	14.17	7,493 to 20,85	Yes	***	<0,001	A-B
10-140 µm2 vs. 650-5000 µm2	15.03	8,411 to 21,64	Yes	***	<0,001	A-C
140-650 µm2 vs. 650-5000 µm2	0.8562	-2,267 to 3,979	No	ns	0.87	B-C
Test details	Mean 1	Mean 2	Mean Diff,	SE of diff,	n1	n2	t	DF
10-140 µm2 vs. 140-650 µm2	18.63	4.462	14.17	2.744	69	63	5.165	85.01
10-140 µm2 vs. 650-5000 µm2	18.63	3.606	15.03	2.711	69	8	5.542	75
140-650 µm2 vs. 650-5000 µm2	4.462	3.606	0.8562	1.238	63	8	0.6915	30.33
	10-140 µm2	140-650 µm2	650-5000 µm2
Number of values	69	63	8
Minimum	0	0	0.107
25% Percentile	0.0995	0.017	0.9563
Median	12.08	0.741	4.201
75% Percentile	26.34	5.377	5.703
Maximum	86.01	35.75	5.865
Mean	18.63	4.462	3.606
Std. Deviation	21.46	7.338	2.329
Std. Error of Mean	2.583	0.9245	0.8235
Lower 95% CI of mean	13.48	2.614	1.659
Upper 95% CI of mean	23.79	6.31	5.553
