# Supplementary material for: Bilateral JNK activation is a hallmark of interface surveillance and promotes elimination of aberrant cells
Source: eLife. 2023 Feb 6;12:e80809. doi: 10.7554/eLife.80809 (PMC9917460; doi:10.7554/eLife.80809)
Supplement: Figure 1—source data 3. [file elife-80809-fig1-data3.xlsx]

## Sheet: Fig1S
	Apical									Basal
wildtype	4	5	7	8	5	4	6	6	4	4	5	7	7	5	4	6	6	4
p35	5	9	8	8	8	6	10	6	8	5	9	8	8	9	6	11	6	8
diap	5	7	4	5	7					5	8	5	5	7
fkh	5	8	9	5	8	9	12	6	11	9	12	12	7	11	9	14	8	11
fkh p35	9	9	15	7	24	15	4	10	10	10	7	14	10	19	13	3	12	9
fkh diap	4	7	5	8						4	8	5	8
Alpha	0.05
Šídák's multiple comparisons test	Predicted (LS) mean diff,	95,00% CI of diff,	Below threshold?	Summary	Adjusted P Value
Apical - Basal
wildtype	0.1111	-1,108 to 1,330	No	ns	>0,99
p35	-0.2222	-1,442 to 0,9971	No	ns	>0,99
diap	-0.4	-2,036 to 1,236	No	ns	0.98
fkh	-2.222	-3,442 to -1,003	Yes	***	<0,001
fkh p35	0.6667	-0,5527 to 1,886	No	ns	0.59
fkh diap	-0.25	-2,079 to 1,579	No	ns	>0,99
Test details	Predicted (LS) mean 1	Predicted (LS) mean 2	Predicted (LS) mean diff,	SE of diff,	N1	N2	t	DF
Apical - Basal
wildtype	5.444	5.333	0.1111	0.44	9	9	0.2525	39
p35	7.556	7.778	-0.2222	0.44	9	9	0.5051	39
diap	5.6	6	-0.4	0.5903	5	5	0.6776	39
fkh	8.111	10.33	-2.222	0.44	9	9	5.051	39
fkh p35	11.44	10.78	0.6667	0.44	9	9	1.515	39
fkh diap	6	6.25	-0.25	0.66	4	4	0.3788	39
	Apical	Basal
Number of values	6	6
Minimum	5.444	5.333
25% Percentile	5.561	5.833
Median	6.778	7.014
75% Percentile	8.944	10.44
Maximum	11.44	10.78
Mean	7.359	7.745
Std. Deviation	2.276	2.324
Std. Error of Mean	0.9292	0.9486
Lower 95% CI of mean	4.971	5.307
Upper 95% CI of mean	9.748	10.18
