# Supplementary material for: Bilateral JNK activation is a hallmark of interface surveillance and promotes elimination of aberrant cells
Source: eLife. 2023 Feb 6;12:e80809. doi: 10.7554/eLife.80809 (PMC9917460; doi:10.7554/eLife.80809)
Supplement: Figure 2—figure supplement 1—source data 1. [file elife-80809-fig2-figsupp1-data1.xlsx]

## Sheet: FigS2.1B
	background	WT cells adjacent to WT interface	WT interface	Clonal interface	Clone interior
wing disc 1	10.702	11.644	14.461	21.772	19.414
wing disc 2	8.871	9.977	13.784	17.511	15.399
wing disc 3	10.923	12.409	16.128	18.914	15.375
wing disc 4	13.39	16.664	21.272	23.521	18.767
wing disc 5	9.693	12.504	18.461	23.411	21.297
wing disc 6	15.535	17.321	21.786	23.813	19.56
wing disc 7	16.463	20.61	29.244	32.139	26.139
wing disc 8	15.665	16.51	22.52	27.299	24.296
wing disc 9	14.403	18.597	24.253	31.024	27.029
wing disc 10	16.945	21.132	29.299	34.481	26.68
Alpha	0.05
Tukey's multiple comparisons test	Mean Diff,	95,00% CI of diff,	Below threshold?	Summary	Adjusted P Value
background vs. WT cells adjacent to WT interface	-2.478	-3,972 to -0,9838	Yes	**	0.002	A-B
background vs. WT interface	-7.862	-11,14 to -4,587	Yes	***	<0,001	A-C
background vs. Clonal interface	-12.13	-15,91 to -8,345	Yes	***	<0,001	A-D
background vs. Clone interior	-8.137	-11,27 to -4,999	Yes	***	<0,001	A-E
WT cells adjacent to WT interface vs. WT interface	-5.384	-7,401 to -3,367	Yes	***	<0,001	B-C
WT cells adjacent to WT interface vs. Clonal interface	-9.652	-12,40 to -6,902	Yes	***	<0,001	B-D
WT cells adjacent to WT interface vs. Clone interior	-5.659	-8,362 to -2,955	Yes	***	<0,001	B-E
WT interface vs. Clonal interface	-4.268	-6,227 to -2,308	Yes	***	<0,001	C-D
WT interface vs. Clone interior	-0.2748	-3,315 to 2,766	No	ns	>0,99	C-E
Clonal interface vs. Clone interior	3.993	2,048 to 5,938	Yes	***	<0,001	D-E
Test details	Mean 1	Mean 2	Mean Diff,	SE of diff,	n1	n2	q	DF
background vs. WT cells adjacent to WT interface	13.26	15.74	-2.478	0.4443	10	10	7.887	9
background vs. WT interface	13.26	21.12	-7.862	0.9738	10	10	11.42	9
background vs. Clonal interface	13.26	25.39	-12.13	1.125	10	10	15.24	9
background vs. Clone interior	13.26	21.4	-8.137	0.9331	10	10	12.33	9
WT cells adjacent to WT interface vs. WT interface	15.74	21.12	-5.384	0.6	10	10	12.69	9
WT cells adjacent to WT interface vs. Clonal interface	15.74	25.39	-9.652	0.8177	10	10	16.69	9
WT cells adjacent to WT interface vs. Clone interior	15.74	21.4	-5.659	0.804	10	10	9.954	9
WT interface vs. Clonal interface	21.12	25.39	-4.268	0.5827	10	10	10.36	9
WT interface vs. Clone interior	21.12	21.4	-0.2748	0.9042	10	10	0.4298	9
Clonal interface vs. Clone interior	25.39	21.4	3.993	0.5783	10	10	9.764	9
	background	WT cells adjacent to WT interface	WT interface	Clonal interface	Clone interior
Number of values	10	10	10	10	10
Minimum	8.871	9.977	13.78	17.51	15.38
25% Percentile	10.45	12.22	15.71	21.06	17.93
Median	13.9	16.59	21.53	23.67	20.43
75% Percentile	15.86	19.1	25.5	31.3	26.27
Maximum	16.95	21.13	29.3	34.48	27.03
Mean	13.26	15.74	21.12	25.39	21.4
Std. Deviation	2.984	3.894	5.531	5.682	4.435
Std. Error of Mean	0.9435	1.231	1.749	1.797	1.402
Lower 95% CI of mean	11.12	12.95	17.16	21.32	18.22
Upper 95% CI of mean	15.39	18.52	25.08	29.45	24.57
