# Supplementary material for: Bilateral JNK activation is a hallmark of interface surveillance and promotes elimination of aberrant cells
Source: eLife. 2023 Feb 6;12:e80809. doi: 10.7554/eLife.80809 (PMC9917460; doi:10.7554/eLife.80809)
Supplement: Figure 2—figure supplement 1—source data 2. [file elife-80809-fig2-figsupp1-data2.xlsx]

## Sheet: FigS2.1D
	background	WT cells adjacent to WT interface	WT interface	Clonal interface	Clone interior
wing disc 1	24.046	26.88	34.52	37.533	28.457
wing disc 2	24.899	25.536	29.346	30.051	23.909
wing disc 3	29.581	32.398	38.196	38.888	34.105
wing disc 4	24.868	27.023	34.333	37.373	29.058
wing disc 5	21.947	26.423	30.058	35.552	26.57
wing disc 6	13.111	14.816	17.911	18.326	23.4
wing disc 7	15.287	18.202	21.741	26.108	18.835
wing disc 8	13.561	16.876	21.081	27.713	25.947
wing disc 9	16.403	18.732	24.849	32.373	23.781
wing disc 10	14.079	15.112	20.236	22.089	17.161
wing disc 11	12.47	14.316	18.612	26.202	19.561
wing disc 12	23.545	28.408	36.618	47.484	28.548
wing disc 13	17.824	19.255	24.792	27.942	20.074
wing disc 14	13.649	15.457	19.397	20.582	13.802
Alpha	0.05
Tukey's multiple comparisons test	Mean Diff,	95,00% CI of diff,	Below threshold?	Summary	Adjusted P Value
background vs. WT cells adjacent to WT interface	-2.44	-3,456 to -1,425	Yes	***	<0,001	A-B
background vs. WT interface	-7.601	-9,566 to -5,637	Yes	***	<0,001	A-C
background vs. Clonal interface	-11.64	-15,79 to -7,491	Yes	***	<0,001	A-D
background vs. Clone interior	-4.853	-7,863 to -1,843	Yes	**	0.002	A-E
WT cells adjacent to WT interface vs. WT interface	-5.161	-6,556 to -3,766	Yes	***	<0,001	B-C
WT cells adjacent to WT interface vs. Clonal interface	-9.199	-12,63 to -5,771	Yes	***	<0,001	B-D
WT cells adjacent to WT interface vs. Clone interior	-2.412	-5,249 to 0,4244	No	ns	0.11	B-E
WT interface vs. Clonal interface	-4.038	-6,714 to -1,361	Yes	**	0.003	C-D
WT interface vs. Clone interior	2.749	-0,6312 to 6,129	No	ns	0.14	C-E
Clonal interface vs. Clone interior	6.786	2,492 to 11,08	Yes	**	0.002	D-E
Test details	Mean 1	Mean 2	Mean Diff,	SE of diff,	n1	n2	q	DF
background vs. WT cells adjacent to WT interface	18.95	21.39	-2.44	0.3226	14	14	10.7	13
background vs. WT interface	18.95	26.55	-7.601	0.6239	14	14	17.23	13
background vs. Clonal interface	18.95	30.59	-11.64	1.317	14	14	12.49	13
background vs. Clone interior	18.95	23.8	-4.853	0.956	14	14	7.178	13
WT cells adjacent to WT interface vs. WT interface	21.39	26.55	-5.161	0.4431	14	14	16.47	13
WT cells adjacent to WT interface vs. Clonal interface	21.39	30.59	-9.199	1.089	14	14	11.95	13
WT cells adjacent to WT interface vs. Clone interior	21.39	23.8	-2.412	0.901	14	14	3.787	13
WT interface vs. Clonal interface	26.55	30.59	-4.038	0.8501	14	14	6.717	13
WT interface vs. Clone interior	26.55	23.8	2.749	1.073	14	14	3.621	13
Clonal interface vs. Clone interior	30.59	23.8	6.786	1.364	14	14	7.038	13
	background	WT cells adjacent to WT interface	WT interface	Clonal interface	Clone interior
Number of values	14	14	14	14	14
Minimum	12.47	14.32	17.91	18.33	13.8
25% Percentile	13.63	15.37	20.03	25.1	19.38
Median	17.11	18.99	24.82	29	23.85
75% Percentile	24.25	26.92	34.38	37.41	28.48
Maximum	29.58	32.4	38.2	47.48	34.11
Mean	18.95	21.39	26.55	30.59	23.8
Std. Deviation	5.668	6.107	7.173	8.105	5.485
Std. Error of Mean	1.515	1.632	1.917	2.166	1.466
Lower 95% CI of mean	15.68	17.86	22.41	25.91	20.63
Upper 95% CI of mean	22.22	24.91	30.69	35.27	26.97
