# Supplementary material for: Bilateral JNK activation is a hallmark of interface surveillance and promotes elimination of aberrant cells
Source: eLife. 2023 Feb 6;12:e80809. doi: 10.7554/eLife.80809 (PMC9917460; doi:10.7554/eLife.80809)
Supplement: Figure 2—source data 1. [file elife-80809-fig2-data1.xlsx]

## Sheet: Fig2I
	background	wildtype cells adjacent to WT interface	WT interface	Clonal interface	Clone interior
wing disc 1	14.688	15.516	14.75	13.453	12.18
wing disc 2	13.712	13.073	12.166	11.909	10.514
wing disc 3	12.253	12.082	11.727	11.563	11.798
wing disc 4	10.058	11.246	11.096	10.874	9.409
wing disc 5	9.307	10.093	10.336	10.155	12.662
wing disc 6	11.204	11.236	11.45	11.341	13.571
wing disc 7	12.022	12.913	12.91	12.678	12.774
wing disc 8	9.746	9.794	10.101	9.052	8.097
wing disc 9	11.542	11.538	11.451	10.263	11.603
wing disc 10	10.667	11.729	11.705	11.322	10.471
wing disc 11	12.952	12.321	12.094	12.74	11.222
wing disc 12	11.26	11.744	11.913	12.778	15.121
wing disc 13	13.021	13.984	14.063	14.505	13.67
wing disc 14	12.252	12.794	12.928	12.698	12.306
wing disc 15	8.372	10.409	10.581	9.675	8.243
wing disc 16	11.797	12.41	11.989	11.456	12.835
wing disc 17	12.688	12.288	12.304	12.044	11.076
wing disc 18	7.887	8.107	8.241	8.822	9.415
wing disc 19	6.919	7.329	7.32	7.641	8.18
wing disc 20	8.797	9.681	9.774	10.588	11.344
wing disc 21	7.688	7.817	7.909	8.53	8.241
wing disc 22	6.126	7.009	7.468	8.094	6.542
wing disc 23	11.867	10.754	10.623	11.435	11.631
wing disc 24	13.188	14.015	13.977	13.835	13.704
wing disc 25	14.369	14.366	13.987	13.157	13.641
wing disc 26	16.48	15.578	16.274	15.004	16.808
wing disc 27	15.818	16.115	16.187	15.055	12.739
wing disc 28	15.286	14.372	14.225	13.592	15.27
wing disc 29	17.157	18.211	18.208	18.598	17.159
Alpha	0.05
Tukey's multiple comparisons test	Mean Diff,	95,00% CI of diff,	Below threshold?	Summary	Adjusted P Value
background vs. wildtype cells adjacent to WT interface	-0.3242	-0,7219 to 0,07357	No	ns	0.15	A-B
background vs. WT interface	-0.2977	-0,7536 to 0,1582	No	ns	0.34	A-C
background vs. Clonal interface	-0.1288	-0,7345 to 0,4770	No	ns	0.97	A-D
background vs. Clone interior	-0.107	-1,023 to 0,8095	No	ns	>0,99	A-E
wildtype cells adjacent to WT interface vs. WT interface	0.02645	-0,1499 to 0,2028	No	ns	>0,99	B-C
wildtype cells adjacent to WT interface vs. Clonal interface	0.1954	-0,2340 to 0,6249	No	ns	0.68	B-D
wildtype cells adjacent to WT interface vs. Clone interior	0.2172	-0,6824 to 1,117	No	ns	0.95	B-E
WT interface vs. Clonal interface	0.169	-0,2002 to 0,5381	No	ns	0.67	C-D
WT interface vs. Clone interior	0.1907	-0,6464 to 1,028	No	ns	0.96	C-E
Clonal interface vs. Clone interior	0.02176	-0,7119 to 0,7554	No	ns	>0,99	D-E
Test details	Mean 1	Mean 2	Mean Diff,	SE of diff,	n1	n2	q	DF
background vs. wildtype cells adjacent to WT interface	11.69	12.02	-0.3242	0.1365	29	29	3.358	28
background vs. WT interface	11.69	11.99	-0.2977	0.1565	29	29	2.691	28
background vs. Clonal interface	11.69	11.82	-0.1288	0.2079	29	29	0.8759	28
background vs. Clone interior	11.69	11.8	-0.107	0.3146	29	29	0.4811	28
wildtype cells adjacent to WT interface vs. WT interface	12.02	11.99	0.02645	0.06053	29	29	0.6179	28
wildtype cells adjacent to WT interface vs. Clonal interface	12.02	11.82	0.1954	0.1474	29	29	1.875	28
wildtype cells adjacent to WT interface vs. Clone interior	12.02	11.8	0.2172	0.3088	29	29	0.9947	28
WT interface vs. Clonal interface	11.99	11.82	0.169	0.1267	29	29	1.886	28
WT interface vs. Clone interior	11.99	11.8	0.1907	0.2873	29	29	0.9388	28
Clonal interface vs. Clone interior	11.82	11.8	0.02176	0.2518	29	29	0.1222	28
	background	wildtype cells adjacent to WT interface	WT interface	Clonal interface	Clone interior
Number of values	29	29	29	29	29
Minimum	6.126	7.009	7.32	7.641	6.542
25% Percentile	9.527	10.25	10.46	10.21	9.943
Median	11.87	12.08	11.91	11.56	11.8
75% Percentile	13.45	14	13.98	13.31	13.61
Maximum	17.16	18.21	18.21	18.6	17.16
Mean	11.69	12.02	11.99	11.82	11.8
Std. Deviation	2.851	2.684	2.611	2.395	2.607
Std. Error of Mean	0.5295	0.4984	0.4849	0.4447	0.4841
Lower 95% CI of mean	10.61	11	11	10.91	10.81
Upper 95% CI of mean	12.78	13.04	12.98	12.73	12.79
