# Supplementary material for: Bilateral JNK activation is a hallmark of interface surveillance and promotes elimination of aberrant cells
Source: eLife. 2023 Feb 6;12:e80809. doi: 10.7554/eLife.80809 (PMC9917460; doi:10.7554/eLife.80809)
Supplement: Figure 2—source data 2. [file elife-80809-fig2-data2.xlsx]

## Sheet: Fig2J
	background	wildtype cells adjacent to WT interface	WT interface	Clonal interface	Clone interior
wing disc 1	14.499	15.262	19.212	27.316	25.605
wing disc 2	13.151	16.377	23.515	33.688	26.389
wing disc 3	12.014	15.168	20.419	30.567	28.579
wing disc 4	14.122	16.866	22.568	32.036	27.074
wing disc 5	13.474	17.454	23.979	34.225	28.254
wing disc 6	16.569	17.511	23.462	33.106	27.516
wing disc 7	12.236	13.882	19.597	26.61	23.052
wing disc 8	13.663	15.452	21.103	29.778	24.543
wing disc 9	12.509	15.211	21.273	33.606	32.598
wing disc 10	14.093	15.609	23.006	31.676	27.28
wing disc 11	15.662	17.01	22.081	27.318	22.737
wing disc 12	13.748	15.929	23.36	27.629	22.15
wing disc 13	12.221	15.281	20.945	27.108	21.9
wing disc 14	15.833	17.934	26.277	34.414	30.279
wing disc 15	25.014	30.459	41.099	52.75	42.019
wing disc 16	13.747	17.04	25.299	38.644	32.3
wing disc 17	20.829	20.763	28.659	42.108	34.551
wing disc 18	16.189	20.54	26.893	38.081	33.949
wing disc 19	14.423	16.021	23.313	28.083	22.763
wing disc 20	14.703	17.895	24.964	36.166	28.513
wing disc 21	14.889	16.73	22.619	32.528	27.703
wing disc 22	18.344	22.138	30.513	42.974	37.102
wing disc 23	14.74	18.569	25.425	34.824	28.673
Alpha	0.05
Tukey's multiple comparisons test	Mean Diff,	95,00% CI of diff,	Below threshold?	Summary	Adjusted P Value
background vs. wildtype cells adjacent to WT interface	-2.54	-3,345 to -1,736	Yes	***	<0,001	A-B
background vs. WT interface	-9.257	-10,69 to -7,827	Yes	***	<0,001	A-C
background vs. Clonal interface	-18.63	-21,19 to -16,08	Yes	***	<0,001	A-D
background vs. Clone interior	-13.43	-15,62 to -11,24	Yes	***	<0,001	A-E
wildtype cells adjacent to WT interface vs. WT interface	-6.717	-7,600 to -5,833	Yes	***	<0,001	B-C
wildtype cells adjacent to WT interface vs. Clonal interface	-16.09	-18,19 to -14,00	Yes	***	<0,001	B-D
wildtype cells adjacent to WT interface vs. Clone interior	-10.89	-12,73 to -9,045	Yes	***	<0,001	B-E
WT interface vs. Clonal interface	-9.376	-10,99 to -7,765	Yes	***	<0,001	C-D
WT interface vs. Clone interior	-4.172	-5,974 to -2,370	Yes	***	<0,001	C-E
Clonal interface vs. Clone interior	5.205	3,910 to 6,499	Yes	***	<0,001	D-E
Test details	Mean 1	Mean 2	Mean Diff,	SE of diff,	n1	n2	q	DF
background vs. wildtype cells adjacent to WT interface	15.07	17.61	-2.54	0.2713	23	23	13.24	22
background vs. WT interface	15.07	24.33	-9.257	0.482	23	23	27.16	22
background vs. Clonal interface	15.07	33.71	-18.63	0.8612	23	23	30.6	22
background vs. Clone interior	15.07	28.5	-13.43	0.7371	23	23	25.76	22
wildtype cells adjacent to WT interface vs. WT interface	17.61	24.33	-6.717	0.2977	23	23	31.91	22
wildtype cells adjacent to WT interface vs. Clonal interface	17.61	33.71	-16.09	0.7068	23	23	32.2	22
wildtype cells adjacent to WT interface vs. Clone interior	17.61	28.5	-10.89	0.6213	23	23	24.79	22
WT interface vs. Clonal interface	24.33	33.71	-9.376	0.5431	23	23	24.42	22
WT interface vs. Clone interior	24.33	28.5	-4.172	0.6074	23	23	9.714	22
Clonal interface vs. Clone interior	33.71	28.5	5.205	0.4363	23	23	16.87	22
	background	wildtype cells adjacent to WT interface	WT interface	Clonal interface	Clone interior
Number of values	23	23	23	23	23
Minimum	12.01	13.88	19.21	26.61	21.9
25% Percentile	13.47	15.45	21.27	28.08	24.54
Median	14.42	16.87	23.36	33.11	27.7
75% Percentile	15.83	17.93	25.43	36.17	32.3
Maximum	25.01	30.46	41.1	52.75	42.02
Mean	15.07	17.61	24.33	33.71	28.5
Std. Deviation	2.968	3.434	4.585	6.211	5.094
Std. Error of Mean	0.6189	0.7159	0.9561	1.295	1.062
Lower 95% CI of mean	13.79	16.13	22.35	31.02	26.3
Upper 95% CI of mean	16.36	19.1	26.31	36.39	30.7
