# Supplementary material for: Bilateral JNK activation is a hallmark of interface surveillance and promotes elimination of aberrant cells
Source: eLife. 2023 Feb 6;12:e80809. doi: 10.7554/eLife.80809 (PMC9917460; doi:10.7554/eLife.80809)
Supplement: Figure 2—source data 3. [file elife-80809-fig2-data3.xlsx]

## Sheet: Fig2K
	background	WT cells adjacent to WT interface	WT interface	Clonal interface	Clone interior
wing disc 1	8.42	9.66	9.833	9.182	9.523
wing disc 2	13.6	13.814	14.065	13.708	13.111
wing disc 3	13.582	13.877	14.498	15.688	15.975
wing disc 4	2.197	2.53	2.591	2.352	2.428
wing disc 5	1.392	1.484	1.51	1.341	1.222
wing disc 6	20.849	20.996	21.273	20.759	20.748
wing disc 7	21.096	23.279	22.812	22.572	22.065
wing disc 8	20.001	19.419	18.904	17.699	18.678
wing disc 9	9.129	9.097	9.153	5.438	5.274
wing disc 10	9.02	8.956	8.993	10.563	9.325
wing disc 11	14.15	15.021	16.024	16.613	14.595
wing disc 12	8.745	8.881	8.78	6.925	4.904
wing disc 13	9.992	9.218	9.26	10.099	9.367
wing disc 14	10.702	10.561	11.073	10.536	10.07
wing disc 15	10.079	9.738	9.674	8.272	7.862
Alpha	0.05
Tukey's multiple comparisons test	Mean Diff,	95,00% CI of diff,	Below threshold?	Summary	Adjusted P Value
background vs. wildtype cells adjacent to WT interface	-0.2385	-0,8305 to 0,3535	No	ns	0.72	A-B
background vs. WT interface	-0.3659	-1,042 to 0,3103	No	ns	0.47	A-C
background vs. Clonal interface	0.08047	-1,299 to 1,459	No	ns	>0,99	A-D
background vs. Clone interior	0.5205	-0,8649 to 1,906	No	ns	0.77	A-E
wildtype cells adjacent to WT interface vs. WT interface	-0.1275	-0,4382 to 0,1832	No	ns	0.71	B-C
wildtype cells adjacent to WT interface vs. Clonal interface	0.3189	-0,8747 to 1,513	No	ns	0.92	B-D
wildtype cells adjacent to WT interface vs. Clone interior	0.7589	-0,4757 to 1,994	No	ns	0.35	B-E
WT interface vs. Clonal interface	0.4464	-0,6037 to 1,496	No	ns	0.68	C-D
WT interface vs. Clone interior	0.8864	-0,2699 to 2,043	No	ns	0.18	C-E
Clonal interface vs. Clone interior	0.44	-0,2236 to 1,104	No	ns	0.29	D-E
Test details	Mean 1	Mean 2	Mean Diff,	SE of diff,	n1	n2	q	DF
background vs. wildtype cells adjacent to WT interface	11.53	11.77	-0.2385	0.19	15	15	1.775	14
background vs. WT interface	11.53	11.9	-0.3659	0.217	15	15	2.384	14
background vs. Clonal interface	11.53	11.45	0.08047	0.4426	15	15	0.2571	14
background vs. Clone interior	11.53	11.01	0.5205	0.4446	15	15	1.656	14
wildtype cells adjacent to WT interface vs. WT interface	11.77	11.9	-0.1275	0.09971	15	15	1.808	14
wildtype cells adjacent to WT interface vs. Clonal interface	11.77	11.45	0.3189	0.3831	15	15	1.177	14
wildtype cells adjacent to WT interface vs. Clone interior	11.77	11.01	0.7589	0.3962	15	15	2.709	14
WT interface vs. Clonal interface	11.9	11.45	0.4464	0.337	15	15	1.873	14
WT interface vs. Clone interior	11.9	11.01	0.8864	0.3711	15	15	3.378	14
Clonal interface vs. Clone interior	11.45	11.01	0.44	0.213	15	15	2.922	14
	background	wildtype cells adjacent to WT interface	WT interface	Clonal interface	Clone interior
Number of values	15	15	15	15	15
Minimum	1.392	1.484	1.51	1.341	1.222
25% Percentile	8.745	8.956	8.993	6.925	5.274
Median	10.08	9.738	9.833	10.54	9.523
75% Percentile	14.15	15.02	16.02	16.61	15.98
Maximum	21.1	23.28	22.81	22.57	22.07
Mean	11.53	11.77	11.9	11.45	11.01
Std. Deviation	5.916	6.132	6.104	6.321	6.414
Std. Error of Mean	1.528	1.583	1.576	1.632	1.656
Lower 95% CI of mean	8.254	8.373	8.516	7.949	7.458
Upper 95% CI of mean	14.81	15.16	15.28	14.95	14.56
