# Supplementary material for: Bilateral JNK activation is a hallmark of interface surveillance and promotes elimination of aberrant cells
Source: eLife. 2023 Feb 6;12:e80809. doi: 10.7554/eLife.80809 (PMC9917460; doi:10.7554/eLife.80809)
Supplement: Figure 2—source data 4. [file elife-80809-fig2-data4.xlsx]

## Sheet: Fig2L
	background	WT cells adjacent to WT interface	WT interface	Clonal interface	Clone interior
wing disc 1	23.964	26.319	30.854	34.324	23.979
wing disc 2	29.677	33.924	40.782	42.8	31.566
wing disc 3	24.42	27.126	31.12	30.401	22.341
wing disc 4	26.99	28.897	35.052	34.923	23.845
wing disc 5	28.959	30.708	36.44	37.267	26.999
wing disc 6	13.742	16.855	21.288	24.509	15.872
wing disc 7	13.584	15.677	19.006	18.499	15.473
wing disc 8	14.454	15.361	20.076	24.609	19.346
wing disc 9	8.611	9.991	12.472	12.477	10.089
wing disc 10	5.872	7.648	9.931	11.486	9.266
Alpha	0.05
Tukey's multiple comparisons test	Mean Diff,	95,00% CI of diff,	Below threshold?	Summary	Adjusted P Value
background vs. WT cells adjacent to WT interface	-2.223	-3,234 to -1,213	Yes	***	<0,001	A-B
background vs. WT interface	-6.675	-8,929 to -4,421	Yes	***	<0,001	A-C
background vs. Clonal interface	-8.102	-11,28 to -4,922	Yes	***	<0,001	A-D
background vs. Clone interior	-0.8503	-3,599 to 1,898	No	ns	0.83	A-E
WT cells adjacent to WT interface vs. WT interface	-4.452	-6,055 to -2,848	Yes	***	<0,001	B-C
WT cells adjacent to WT interface vs. Clonal interface	-5.879	-8,631 to -3,127	Yes	***	<0,001	B-D
WT cells adjacent to WT interface vs. Clone interior	1.373	-1,674 to 4,420	No	ns	0.58	B-E
WT interface vs. Clonal interface	-1.427	-3,387 to 0,5318	No	ns	0.19	C-D
WT interface vs. Clone interior	5.825	1,733 to 9,916	Yes	**	0.007	C-E
Clonal interface vs. Clone interior	7.252	3,329 to 11,18	Yes	**	0.001	D-E
Test details	Mean 1	Mean 2	Mean Diff,	SE of diff,	n1	n2	q	DF
background vs. WT cells adjacent to WT interface	19.03	21.25	-2.223	0.3004	10	10	10.47	9
background vs. WT interface	19.03	25.7	-6.675	0.6704	10	10	14.08	9
background vs. Clonal interface	19.03	27.13	-8.102	0.9457	10	10	12.12	9
background vs. Clone interior	19.03	19.88	-0.8503	0.8174	10	10	1.471	9
WT cells adjacent to WT interface vs. WT interface	21.25	25.7	-4.452	0.4768	10	10	13.2	9
WT cells adjacent to WT interface vs. Clonal interface	21.25	27.13	-5.879	0.8185	10	10	10.16	9
WT cells adjacent to WT interface vs. Clone interior	21.25	19.88	1.373	0.906	10	10	2.143	9
WT interface vs. Clonal interface	25.7	27.13	-1.427	0.5827	10	10	3.465	9
WT interface vs. Clone interior	25.7	19.88	5.825	1.217	10	10	6.77	9
Clonal interface vs. Clone interior	27.13	19.88	7.252	1.167	10	10	8.79	9
	background	WT cells adjacent to WT interface	WT interface	Clonal interface	Clone interior
Number of values	10	10	10	10	10
Minimum	5.872	7.648	9.931	11.49	9.266
25% Percentile	12.34	14.02	17.37	16.99	14.13
Median	19.21	21.59	26.07	27.51	20.84
75% Percentile	27.48	29.35	35.4	35.51	24.73
Maximum	29.68	33.92	40.78	42.8	31.57
Mean	19.03	21.25	25.7	27.13	19.88
Std. Deviation	8.749	9.223	10.57	10.64	7.227
Std. Error of Mean	2.767	2.917	3.343	3.364	2.285
Lower 95% CI of mean	12.77	14.65	18.14	19.52	14.71
Upper 95% CI of mean	25.29	27.85	33.26	34.74	25.05
