# Supplementary material for: Bilateral JNK activation is a hallmark of interface surveillance and promotes elimination of aberrant cells
Source: eLife. 2023 Feb 6;12:e80809. doi: 10.7554/eLife.80809 (PMC9917460; doi:10.7554/eLife.80809)
Supplement: Figure 3—source data 1. [file elife-80809-fig3-data1.xlsx]

## Sheet: Fig3G
	Background				Wildtype interface				Clonal interface				Clone interior
UAS-ey	20.267	19.117	15.254	12.261	24.137	23.539	21.824	15.847	26.787	23.439	21.029	16.086	21.839	17.561	15.576	11.259
UAS-BskDN; UAS-ey	15.582	14.158	16.251	11.998	17.336	17.495	19.581	14.446	12.31	8.751	12.431	8.807	13.411	6.988	11.54	8.303
Alpha	0.05
Šídák's multiple comparisons test	Mean Diff,	95,00% CI of diff,	Below threshold?	Summary	Adjusted P Value
UAS-ey - UAS-BskDN; UAS-ey
Background	2.228	-6,045 to 10,50	No	ns	0.8
Wildtype interface	4.122	-4,359 to 12,60	No	ns	0.4
Clonal interface	11.26	0,9704 to 21,55	Yes	*	0.04
Clone interior	6.498	-3,310 to 16,31	No	ns	0.2
Test details	Mean 1	Mean 2	Mean Diff,	SE of diff,	N1	N2	t	DF
UAS-ey - UAS-BskDN; UAS-ey
Background	16.72	14.5	2.228	2.061	4	4	1.081	4.476
Wildtype interface	21.34	17.21	4.122	2.168	4	4	1.901	4.698
Clonal interface	21.84	10.57	11.26	2.478	4	4	4.544	4.219
Clone interior	16.56	10.06	6.498	2.644	4	4	2.458	5.238
	Background	Wildtype interface	Clonal interface	Clone interior
Number of values	2	2	2	2
Minimum	14.5	17.21	10.57	10.06
25% Percentile	14.5	17.21	10.57	10.06
Median	15.61	19.28	16.21	13.31
75% Percentile	16.72	21.34	21.84	16.56
Maximum	16.72	21.34	21.84	16.56
Mean	15.61	19.28	16.21	13.31
Std. Deviation	1.575	2.915	7.962	4.595
Std. Error of Mean	1.114	2.061	5.63	3.249
Lower 95% CI of mean	1.459	-6.913	-55.33	-27.97
Upper 95% CI of mean	29.76	45.46	87.74	54.59
