# Supplementary material for: Bilateral JNK activation is a hallmark of interface surveillance and promotes elimination of aberrant cells
Source: eLife. 2023 Feb 6;12:e80809. doi: 10.7554/eLife.80809 (PMC9917460; doi:10.7554/eLife.80809)
Supplement: Figure 3—source data 2. [file elife-80809-fig3-data2.xlsx]

## Sheet: Fig3H
	Background							Wildtype interface							Clonal interface							Clone interior
UAS-ey	13.749	12.917	12.184	11.92	14.203	10.556	22.466	23.061	18.942	19.881	17.29	20.434	15.747	36.705	32.291	20.667	24.223	23.11	24.065	18.365	37.372	23.824	18.871	18.783	18.904	17.471	12.823	26.623
UAS-BskDN,UAS-ey	11.654	10.499	8.995	9.228	12.747	12.241	12.367	15.384	13.675	13.476	11.288	15.299	13.366	15.852	33.227	23.029	22.621	14.379	28.805	22.864	29.595	28.592	19.961	15.013	15.413	27.801	24.068	28.442
Alpha	0.05
Šídák's multiple comparisons test	Mean Diff,	95,00% CI of diff,	Below threshold?	Summary	Adjusted P Value
UAS-ey - UAS-BskDN,UAS-ey
Background	2.895	-4,168 to 9,957	No	ns	0.75
Wildtype interface	7.674	0,6118 to 14,74	Yes	*	0.03
Clonal interface	0.7961	-6,266 to 7,859	No	ns	>0,99
Clone interior	-3.142	-10,20 to 3,921	No	ns	0.69
Test details	Mean 1	Mean 2	Mean Diff,	SE of diff,	N1	N2	t	DF
UAS-ey - UAS-BskDN,UAS-ey
Background	14	11.1	2.895	2.729	7	7	1.061	48
Wildtype interface	21.72	14.05	7.674	2.729	7	7	2.812	48
Clonal interface	25.73	24.93	0.7961	2.729	7	7	0.2917	48
Clone interior	19.61	22.76	-3.142	2.729	7	7	1.151	48
	Background	Wildtype interface	Clonal interface	Clone interior
Number of values	2	2	2	2
Minimum	11.1	14.05	24.93	19.61
25% Percentile	11.1	14.05	24.93	19.61
Median	12.55	17.89	25.33	21.18
75% Percentile	14	21.72	25.73	22.76
Maximum	14	21.72	25.73	22.76
Mean	12.55	17.89	25.33	21.18
Std. Deviation	2.047	5.427	0.563	2.221
Std. Error of Mean	1.447	3.837	0.3981	1.571
Lower 95% CI of mean	-5.839	-30.87	20.27	1.226
Upper 95% CI of mean	30.94	66.64	30.39	41.14
