# Supplementary material for: Bilateral JNK activation is a hallmark of interface surveillance and promotes elimination of aberrant cells
Source: eLife. 2023 Feb 6;12:e80809. doi: 10.7554/eLife.80809 (PMC9917460; doi:10.7554/eLife.80809)
Supplement: Figure 4—source data 1. [file elife-80809-fig4-data1.xlsx]

## Sheet: Fig4C
		Mean TRE intensity of zones in Myc clones
	WT cells	WT cells at interface	Clonal cells at interface	Clonal cells
wing disc1	20.432	26.664	26.946	26.212
wing disc2	26.035	25.106	23.855	23.749
wing disc3	22.46	23.752	23.65	24.304
wing disc4	17.922	24.889	24.634	23.692
wing disc5	24.389	26.119	23.789	22.746
wing disc6	19.451	20.993	21.597	23.686
TRE-RFP was studied in discs with Myc clones in 2 independent experiments, with matched WT controls.
Alpha	0.05
Tukey's multiple comparisons test	Mean Diff.	95.00% CI of diff.	Below threshold?	Summary	Adjusted P Value
WT cells vs. Wildtype cells at interface	-2.806	-7.475 to 1.864	No	ns	0.24	A-B
WT cells vs. Clonal cells ar interface	-2.297	-7.810 to 3.216	No	ns	0.48	A-C
WT cells vs. clonal cells	-2.283	-7.701 to 3.135	No	ns	0.47	A-D
Wildtype cells at interface vs. Clonal cells ar interface	0.5087	-1.136 to 2.154	No	ns	0.68	B-C
Wildtype cells at interface vs. clonal cells	0.5223	-2.548 to 3.593	No	ns	0.92	B-D
Clonal cells ar interface vs. clonal cells	0.01367	-1.808 to 1.836	No	ns	>0.99	C-D
Test details	Mean 1	Mean 2	Mean Diff.	SE of diff.	n1	n2	q	DF
WT cells vs. Wildtype cells at interface	21.78	24.59	-2.806	1.266	6	6	3.135	5
WT cells vs. Clonal cells ar interface	21.78	24.08	-2.297	1.494	6	6	2.174	5
WT cells vs. clonal cells	21.78	24.06	-2.283	1.468	6	6	2.199	5
Wildtype cells at interface vs. Clonal cells ar interface	24.59	24.08	0.5087	0.4458	6	6	1.614	5
Wildtype cells at interface vs. clonal cells	24.59	24.06	0.5223	0.8322	6	6	0.8877	5
Clonal cells ar interface vs. clonal cells	24.08	24.06	0.01367	0.4938	6	6	0.03914	5
	WT cells	Wildtype cells at interface	Clonal cells ar interface	clonal cells
Number of values	6	6	6	6
Number of missing values	0	0	0	0
Minimum	17.92	20.99	21.6	22.75
25% Percentile	19.07	23.06	23.14	23.45
Median	21.45	25	23.82	23.72
75% Percentile	24.8	26.26	25.21	24.78
Maximum	26.04	26.66	26.95	26.21
Mean	21.78	24.59	24.08	24.06
Std. Deviation	3.082	2.032	1.732	1.165
Std. Error of Mean	1.258	0.8294	0.7073	0.4757
Lower 95% CI	18.55	22.46	22.26	22.84
Upper 95% CI	25.02	26.72	25.9	25.29
