# Supplementary material for: Bilateral JNK activation is a hallmark of interface surveillance and promotes elimination of aberrant cells
Source: eLife. 2023 Feb 6;12:e80809. doi: 10.7554/eLife.80809 (PMC9917460; doi:10.7554/eLife.80809)
Supplement: Figure 4—source data 2. [file elife-80809-fig4-data2.xlsx]

## Sheet: Fig4E
	Mean TRE intensity of zones in RpS3-/- clones
	WT cells	WT cells at interface	Clonal cells at interface	Clonal cells
wing disc1	23.172	24.197	31.311	34.656
wing disc2	18.474	20.556	26.814	28.161
wing disc3	19.703	21.09	25.477	31.78
TRE-RFP was studied in discs with RpS3-/- clones in 2 independent experiments.
Alpha	0.05
Tukey's multiple comparisons test	Mean Diff.	95.00% CI of diff.	Below threshold?	Summary	Adjusted P Value
WT cells vs. Wiltype cells at interface	-1.5	-3.65 to 0.651	No	ns	0.1	A-B
WT cells vs. Clonal cells at interface	-7.42	-13.1 to -1.71	Yes	*	0.03	A-C
WT cells vs. Clone cells	-11.1	-16.1 to -6.10	Yes	*	0.01	A-D
Wiltype cells at interface vs. Clonal cells at interface	-5.92	-11.5 to -0.341	Yes	*	0.04	B-C
Wiltype cells at interface vs. Clone cells	-9.58	-16.5 to -2.71	Yes	*	0.03	B-D
Clonal cells at interface vs. Clone cells	-3.67	-13.6 to 6.31	No	ns	0.29	C-D
Test details	Mean 1	Mean 2	Mean Diff.	SE of diff.	n1	n2	q	DF
WT cells vs. Wiltype cells at interface	20.4	21.9	-1.5	0.31	3	3	6.83	2
WT cells vs. Clonal cells at interface	20.4	27.9	-7.42	0.824	3	3	12.7	2
WT cells vs. Clone cells	20.4	31.5	-11.1	0.719	3	3	21.8	2
Wiltype cells at interface vs. Clonal cells at interface	21.9	27.9	-5.92	0.805	3	3	10.4	2
Wiltype cells at interface vs. Clone cells	21.9	31.5	-9.58	0.992	3	3	13.7	2
Clonal cells at interface vs. Clone cells	27.9	31.5	-3.67	1.44	3	3	3.6	2
	WT cells	WT cells at interface	Clonal cells at interface	Clonal cells
Number of values	3	3	3	3
Number of missing values	0	0	0	0
Minimum	18.5	20.6	25.5	28.2
25% Percentile	18.5	20.6	25.5	28.2
Median	19.7	21.1	26.8	31.8
75% Percentile	23.2	24.2	31.3	34.7
Maximum	23.2	24.2	31.3	34.7
Mean	20.4	21.9	27.9	31.5
Std. Deviation	2.44	1.97	3.06	3.25
Std. Error of Mean	1.41	1.14	1.76	1.88
Lower 95% CI	14.4	17.1	20.3	23.4
Upper 95% CI	26.5	26.8	35.5	39.6
