# Supplementary material for: Bilateral JNK activation is a hallmark of interface surveillance and promotes elimination of aberrant cells
Source: eLife. 2023 Feb 6;12:e80809. doi: 10.7554/eLife.80809 (PMC9917460; doi:10.7554/eLife.80809)
Supplement: Figure 5—figure supplement 1—source data 1. [file elife-80809-fig5-figsupp1-data1.xlsx]

## Sheet: FigS5B
eyless
	background	wildtype interface	clonal interface	clone interior
wing disc 1	0.618506	3.57248	12.275	5.306
wing disc 2	0.792569	3.09305	15.14	20.157
wing disc 3	0.554752	2.28599	12.518	8.922
wing disc 4	0.665406	2.1369	12.326	16.287
wing disc 5	0.441986	1.52146	14.679	24.222
wing disc 6	0.183289	0.287348	4.97	10.472
wing disc 7	0.175306	0.329767	7.547	4.299
wing disc 8	0.261848	0.443761	7.518	9.328
wing disc 9	0.463117	1.55845	6.079	16.64
wing disc 10	0.295792	0.491823	5.538	2.292
wing disc 11	0.928493	1.89216	10.408	19.8
wing disc 12	0.181166	0.482797	9.095	13.91
wing disc 13	0.384878	0.200796	9.003	10.279
wing disc 14	0.684429	0.850791	14.629	23.549
Alpha	0.05
Tukey's multiple comparisons test	Mean Diff,	95,00% CI of diff,	Below threshold?	Summary	Adjusted P Value
background vs. wildtype interface	-0.894	-1,633 to -0,1548	Yes	*	0.02	A-B
background vs. clonal interface	-9.65	-12,29 to -7,013	Yes	***	<0,001	A-C
background vs. clone interior	-12.77	-18,23 to -7,321	Yes	***	<0,001	A-D
wildtype interface vs. clonal interface	-8.756	-11,07 to -6,440	Yes	***	<0,001	B-C
wildtype interface vs. clone interior	-11.88	-17,32 to -6,441	Yes	***	<0,001	B-D
clonal interface vs. clone interior	-3.124	-7,559 to 1,311	No	ns	0.21	C-D
Test details	Mean 1	Mean 2	Mean Diff,	SE of diff,	n1	n2	q	DF
background vs. wildtype interface	0.4737	1.368	-0.894	0.2518	14	14	5.02	13
background vs. clonal interface	0.4737	10.12	-9.65	0.8984	14	14	15.19	13
background vs. clone interior	0.4737	13.25	-12.77	1.858	14	14	9.724	13
wildtype interface vs. clonal interface	1.368	10.12	-8.756	0.7888	14	14	15.7	13
wildtype interface vs. clone interior	1.368	13.25	-11.88	1.853	14	14	9.067	13
clonal interface vs. clone interior	10.12	13.25	-3.124	1.511	14	14	2.924	13
	background	wildtype interface	clonal interface	clone interior
Number of values	14	14	14	14
Minimum	0.1753	0.2008	4.97	2.292
25% Percentile	0.2422	0.4153	7.158	8.018
Median	0.4526	1.186	9.752	12.19
75% Percentile	0.6702	2.174	13.05	19.89
Maximum	0.9285	3.572	15.14	24.22
Mean	0.4737	1.368	10.12	13.25
Std. Deviation	0.2421	1.105	3.521	7.083
Std. Error of Mean	0.06469	0.2954	0.9411	1.893
Lower 95% CI of mean	0.3339	0.7294	8.09	9.158
Upper 95% CI of mean	0.6134	2.006	12.16	17.34
