# Supplementary material for: Bilateral JNK activation is a hallmark of interface surveillance and promotes elimination of aberrant cells
Source: eLife. 2023 Feb 6;12:e80809. doi: 10.7554/eLife.80809 (PMC9917460; doi:10.7554/eLife.80809)
Supplement: Figure 5—figure supplement 1—source data 2. [file elife-80809-fig5-figsupp1-data2.xlsx]

## Sheet: FigS5C
FigS5C_2022.12.29 lexo tkv anterior analysis											FigS5C_2022.12.30 tkv 1way anova
background	wildtype interface	clonal interface	clone interior								background	wildtype interface	clonal interface	clone interior
0.627	2.23017	4.307	4.042								0.481892	0.836212	3.878	2.34
0.435	2.54054	4.007	2.875								0.23333	0.63183	2.861	2.882
0.47	1.78018	4.577	6.69								0.221983	0.315571	3.083	1.778
0.24	0.59166	2.72	6.097								0.421652	0.697951	3.449	1.736
0.546	1.7768	4.161	6.777								0.460941	1.21659	0.903	1.049
1.026	1.72177	3.933	2.647								0.285309	0.852998	5.372	5.489
0.608	3.03165	7.247	6.483								0.59395	0.7877	4.239	6.582
0.703	2.52032	7.079	4.756								0.705734	1.00415	3.117	3.613
1.151	1.80475	2.966	0.568								0.247473	0.421579	3.039	2.283
0.85	0.78946	2.572	4.581								0.375618	0.477285	2.889	2.539
Alpha	0.05										Alpha	0.05
Tukey's multiple comparisons test	Mean Diff,	95,00% CI of diff,	Below threshold?	Summary	Adjusted P Value						Tukey's multiple comparisons test	Mean Diff,	95,00% CI of diff,	Below threshold?	Summary	Adjusted P Value
background vs. wildtype interface	-1.213	-2,001 to -0,4252	Yes	**	0.004	A-B					background vs. wildtype interface	-0.3214	-0,5287 to -0,1141	Yes	**	0.004	A-B
background vs. clonal interface	-3.691	-5,355 to -2,027	Yes	***	<0,001	A-C					background vs. clonal interface	-2.88	-4,025 to -1,735	Yes	***	<0,001	A-C
background vs. clone interior	-3.886	-6,124 to -1,648	Yes	**	0.002	A-D					background vs. clone interior	-2.626	-4,311 to -0,9420	Yes	**	0.004	A-D
wildtype interface vs. clonal interface	-2.478	-3,572 to -1,384	Yes	***	<0,001	B-C					wildtype interface vs. clonal interface	-2.559	-3,769 to -1,348	Yes	***	<0,001	B-C
wildtype interface vs. clone interior	-2.673	-4,881 to -0,4644	Yes	*	0.02	B-D					wildtype interface vs. clone interior	-2.305	-4,016 to -0,5941	Yes	*	0.01	B-D
clonal interface vs. clone interior	-0.1947	-2,304 to 1,915	No	ns	>0,99	C-D					clonal interface vs. clone interior	0.2539	-0,9245 to 1,432	No	ns	0.9	C-D
Test details	Mean 1	Mean 2	Mean Diff,	SE of diff,	n1	n2	q	DF			Test details	Mean 1	Mean 2	Mean Diff,	SE of diff,	n1	n2	q	DF
background vs. wildtype interface	0.6656	1.879	-1.213	0.2524	10	10	6.797	9			background vs. wildtype interface	0.4028	0.7242	-0.3214	0.06642	10	10	6.844	9
background vs. clonal interface	0.6656	4.357	-3.691	0.533	10	10	9.794	9			background vs. clonal interface	0.4028	3.283	-2.88	0.3669	10	10	11.1	9
background vs. clone interior	0.6656	4.552	-3.886	0.7169	10	10	7.666	9			background vs. clone interior	0.4028	3.029	-2.626	0.5395	10	10	6.884	9
wildtype interface vs. clonal interface	1.879	4.357	-2.478	0.3504	10	10	10	9			wildtype interface vs. clonal interface	0.7242	3.283	-2.559	0.3878	10	10	9.331	9
wildtype interface vs. clone interior	1.879	4.552	-2.673	0.7074	10	10	5.343	9			wildtype interface vs. clone interior	0.7242	3.029	-2.305	0.548	10	10	5.948	9
clonal interface vs. clone interior	4.357	4.552	-0.1947	0.6758	10	10	0.4074	9			clonal interface vs. clone interior	3.283	3.029	0.2539	0.3775	10	10	0.9513	9
	background	wildtype interface	clonal interface	clone interior								background	wildtype interface	clonal interface	clone interior
Number of values	10	10	10	10							Number of values	10	10	10	10
Minimum	0.24	0.5917	2.572	0.568							Minimum	0.222	0.3156	0.903	1.049
25% Percentile	0.4613	1.489	2.905	2.818							25% Percentile	0.2439	0.4634	2.882	1.768
Median	0.6175	1.792	4.084	4.669							Median	0.3986	0.7428	3.1	2.44
75% Percentile	0.894	2.525	5.203	6.535							75% Percentile	0.5099	0.8908	3.968	4.082
Maximum	1.151	3.032	7.247	6.777							Maximum	0.7057	1.217	5.372	6.582
Mean	0.6656	1.879	4.357	4.552							Mean	0.4028	0.7242	3.283	3.029
Std. Deviation	0.2774	0.7598	1.631	2.062							Std. Deviation	0.1627	0.2754	1.144	1.747
Std. Error of Mean	0.08772	0.2403	0.5159	0.652							Std. Error of Mean	0.05147	0.0871	0.3619	0.5524
Lower 95% CI of mean	0.4672	1.335	3.19	3.077							Lower 95% CI of mean	0.2864	0.5272	2.464	1.779
Upper 95% CI of mean	0.864	2.422	5.524	6.026							Upper 95% CI of mean	0.5192	0.9212	4.102	4.279
