# Supplementary material for: Bilateral JNK activation is a hallmark of interface surveillance and promotes elimination of aberrant cells
Source: eLife. 2023 Feb 6;12:e80809. doi: 10.7554/eLife.80809 (PMC9917460; doi:10.7554/eLife.80809)
Supplement: Figure 5—source data 1. [file elife-80809-fig5-data1.xlsx]

## Sheet: Fig5B
	background	wildtype interface	clonal interface	clone interior
wing disc 1	0.152946	0.834196	5.424	7.236
wing disc 2	0.452545	0.570562	1.605	2.13
wing disc 3	0.338704	0.944201	7.701	10.463
wing disc 4	0.23301	0.313406	4.931	5.253
wing disc 5	0.646332	1.28748	2.375	0.889
wing disc 6	0.11022	1.10363	8.637	6.938
wing disc 7	0.309683	1.18345	5.071	4.976
wing disc 8	0.360904	0.697295	0.595	1.252
wing disc 9	0.348003	0.617039	2.762	4.112
Alpha	0.05
Tukey's multiple comparisons test	Mean Diff,	95,00% CI of diff,	Below threshold?	Summary	Adjusted P Value
background vs. wildtype interface	-0.511	-0,8585 to -0,1634	Yes	**	0.007	A-B
background vs. clonal interface	-4.017	-7,046 to -0,9869	Yes	*	0.01	A-C
background vs. clone interior	-4.477	-7,930 to -1,025	Yes	*	0.01	A-D
wildtype interface vs. clonal interface	-3.506	-6,334 to -0,6770	Yes	*	0.02	B-C
wildtype interface vs. clone interior	-3.966	-7,298 to -0,6347	Yes	*	0.02	B-D
clonal interface vs. clone interior	-0.4609	-2,005 to 1,083	No	ns	0.78	C-D
Test details	Mean 1	Mean 2	Mean Diff,	SE of diff,	n1	n2	q	DF
background vs. wildtype interface	0.328	0.839	-0.511	0.1085	9	9	6.659	8
background vs. clonal interface	0.328	4.345	-4.017	0.9461	9	9	6.004	8
background vs. clone interior	0.328	4.805	-4.477	1.078	9	9	5.874	8
wildtype interface vs. clonal interface	0.839	4.345	-3.506	0.8833	9	9	5.613	8
wildtype interface vs. clone interior	0.839	4.805	-3.966	1.04	9	9	5.392	8
clonal interface vs. clone interior	4.345	4.805	-0.4609	0.4821	9	9	1.352	8
	background	wildtype interface	clonal interface	clone interior
Number of values	9	9	9	9
Minimum	0.1102	0.3134	0.595	0.889
25% Percentile	0.193	0.5938	1.99	1.691
Median	0.3387	0.8342	4.931	4.976
75% Percentile	0.4067	1.144	6.563	7.087
Maximum	0.6463	1.287	8.637	10.46
Mean	0.328	0.839	4.345	4.805
Std. Deviation	0.1604	0.3199	2.731	3.128
Std. Error of Mean	0.05347	0.1066	0.9104	1.043
Lower 95% CI of mean	0.2047	0.5932	2.245	2.401
Upper 95% CI of mean	0.4513	1.085	6.444	7.21
