# Supplementary material for: Bilateral JNK activation is a hallmark of interface surveillance and promotes elimination of aberrant cells
Source: eLife. 2023 Feb 6;12:e80809. doi: 10.7554/eLife.80809 (PMC9917460; doi:10.7554/eLife.80809)
Supplement: Figure 5—source data 2. [file elife-80809-fig5-data2.xlsx]

## Sheet: FigS5H
	background							wildtype interface							clonal interface							clone interior
UAS-tkvCA	0.481892	0.23333	0.221983	0.421652	0.285309	0.59395	0.705734	0.836212	0.63183	0.315571	0.697951	0.852998	0.7877	1.00415	3.878	2.861	3.083	3.449	5.372	4.239	3.117	2.34	2.882	1.778	1.736	5.489	6.582	3.613
UAS-BskDN; UAS-tkvCA	0.385866	0.095839	0.533479	0.204965	0.394129	0.254964	0.466535	0.739489	0.307896	0.474962	0.309744	0.491595	1.02642	0.578815	0.887	1.199	1.311	0.528	2.734	1.777	2.134	0.571	0.745	0.927	0.406	5.851	3.809	7.413
Alpha	0.05
Šídák's multiple comparisons test	Mean Diff,	95,00% CI of diff,	Below threshold?	Summary	Adjusted P Value
UAS-tkvCA - UAS-BskDN; UAS-tkvCA
background	0.08687	-0,1821 to 0,3558	No	ns	0.83
wildtype interface	0.1711	-0,2012 to 0,5433	No	ns	0.6
clonal interface	2.204	0,9193 to 3,489	Yes	**	0.001
clone interior	0.6711	-3,247 to 4,590	No	ns	0.98
Test details	Mean 1	Mean 2	Mean Diff,	SE of diff,	N1	N2	t	DF
UAS-tkvCA - UAS-BskDN; UAS-tkvCA
background	0.4206	0.3337	0.08687	0.09144	7	7	0.9499	11.61
wildtype interface	0.7323	0.5613	0.1711	0.1268	7	7	1.349	11.74
clonal interface	3.714	1.51	2.204	0.4378	7	7	5.034	11.76
clone interior	3.489	2.817	0.6711	1.303	7	7	0.5151	10.32
	background	wildtype interface	clonal interface	clone interior
Number of values	2	2	2	2
Minimum	0.3337	0.5613	1.51	2.817
25% Percentile	0.3337	0.5613	1.51	2.817
Median	0.3771	0.6468	2.612	3.153
75% Percentile	0.4206	0.7323	3.714	3.489
Maximum	0.4206	0.7323	3.714	3.489
Range	0.08687	0.1711	2.204	0.6711
Mean	0.3771	0.6468	2.612	3.153
Std. Deviation	0.06142	0.121	1.559	0.4746
Std. Error of Mean	0.04343	0.08553	1.102	0.3356
Lower 95% CI of mean	-0.1748	-0.44	-11.39	-1.111
Upper 95% CI of mean	0.929	1.734	16.62	7.417
