# Supplementary material for: Bilateral JNK activation is a hallmark of interface surveillance and promotes elimination of aberrant cells
Source: eLife. 2023 Feb 6;12:e80809. doi: 10.7554/eLife.80809 (PMC9917460; doi:10.7554/eLife.80809)
Supplement: Figure 5—source data 3. [file elife-80809-fig5-data3.xlsx]

## Sheet: FigS5L
	background											wildtype interface											clonal itnerface											clone interior
anterior	0.627	0.435	0.47	0.24	0.546	1.026	2.591	0.608	0.703	1.151	0.85	2.23017	2.54054	1.78018	0.59166	1.7768	1.72177	1.29965	3.03165	2.52032	1.80475	0.78946	4.307	4.007	4.577	2.72	4.161	3.933	3.653	7.247	7.079	2.966	2.572	4.042	2.875	6.69	6.097	6.777	2.647	3.425	6.483	4.756	0.568	4.581
posterior	0.487	0.264	0.174	0.044	0.979	0.763	1.315	0.105	0.244	0.014	1.521	0.601358	0.232754	0.69724	0.417318	1.41566	1.16353	1.4077	1.16559	0.624103	1.02165	0.110896	1.456	1.538	1.927	1.338	4.1	1.466	5.607	2.484	2.067	2.186	0.685	6.258	8.348	4.34	3.042	12.924	1.452	10.306	2.84	4.69	4.739	0.765
Alpha	0.05
Šídák's multiple comparisons test	Mean Diff,	95,00% CI of diff,	Below threshold?	Summary	Adjusted P Value
anterior - posterior
background	0.3034	-0,2173 to 0,8240	No	ns	0.37
wildtype interface	1.021	0,2950 to 1,747	Yes	**	0.007
clonal itnerface	2.033	0,2182 to 3,849	Yes	*	0.03
clone interior	-0.9785	-4,752 to 2,796	No	ns	0.91
Test details	Mean 1	Mean 2	Mean Diff,	SE of diff,	N1	N2	t	DF
anterior - posterior
background	0.8406	0.5373	0.3034	0.172	11	11	1.764	10
wildtype interface	1.826	0.8053	1.021	0.2398	11	11	4.257	10
clonal itnerface	4.293	2.259	2.033	0.5997	11	11	3.391	10
clone interior	4.449	5.428	-0.9785	1.247	11	11	0.7848	10
	background	wildtype interface	clonal itnerface	clone interior
Number of values	2	2	2	2
Minimum	0.5373	0.8053	2.259	4.449
25% Percentile	0.5373	0.8053	2.259	4.449
Median	0.689	1.316	3.276	4.938
75% Percentile	0.8406	1.826	4.293	5.428
Maximum	0.8406	1.826	4.293	5.428
Range	0.3034	1.021	2.033	0.9785
Mean	0.689	1.316	3.276	4.938
Std. Deviation	0.2145	0.7218	1.438	0.6919
Std. Error of Mean	0.1517	0.5104	1.017	0.4892
Lower 95% CI of mean	-1.238	-5.17	-9.643	-1.278
Upper 95% CI of mean	2.616	7.801	16.19	11.15
