# Supplementary material for: Bilateral JNK activation is a hallmark of interface surveillance and promotes elimination of aberrant cells
Source: eLife. 2023 Feb 6;12:e80809. doi: 10.7554/eLife.80809 (PMC9917460; doi:10.7554/eLife.80809)
Supplement: Figure 6—figure supplement 1—source data 1. [file elife-80809-fig6-figsupp1-data1.xlsx]

## Sheet: FigS6B
Area	whole clone TRE				whole clone TRE
405.808	42.62			Semilog line
509.863	34.897			Best-fit values
2299.68	25.917			Slope	-10.3
4526.99	30.686			Yintercept	58.56
250.68	30.206			95% CI (profile likelihood)
192.608	41.043			Slope	-13,61 to -6,992
230.957	37.947			Yintercept	51,24 to 65,88
1558.28	22.016			Hougaard's Measure of Skewness
1140.21	17.763			Slope	0
413.559	22.182			Yintercept	0
490.255	31.432			Goodness of Fit
208.225	44.208			Degrees of Freedom	138
389.786	26.093			R squared	0.2154
203.078	24.169			Adjusted R squared	0.2097
175.661	45.806			Sum of Squares	14714
180.173	34.394			Sy.x	10.33
186.188	34.879			RMSE	10.29
169.935	37.003			AICc	657.9
217.306	32.107			Normality of Residuals
240.558	40.862			Kolmogorov-Smirnov (distance)	0.05002
203.02	46.947			P value	>0,10
317.717	45.012			Passed normality test (alpha=0.05)?	Yes
169.414	27.254			P value summary	ns
388.976	25.246			Covariance Matrix
274.973	20.418			Slope & Yintercept	-0.9718
570.364	35.127			Dependency
359.304	34.721			Slope	0.9444
2532.19	24.957			Yintercept	0.9444
560.705	32.002
265.256	20.601			Number of points
364.741	36.723			# of X values	140
151.021	30.123			# Y values analyzed	140
430.969	31.75
573.314	22.005
207.531	40.59				Area vs. whole clone TRE
1305.34	31.701			Spearman r
261.265	30.31			r	-0.4803
575.107	29.593			95% confidence interval	-0,6017 to -0,3372
225.809	21.477
143.502	46.846			P value
2972.88	32.029			P (two-tailed)	<0,001
218.926	36.826			P value summary	***
465.21	41.307			Exact or approximate P value?	Approximate
332.062	42.814			Significant? (alpha = 0.05)	Yes
209.613	42.744
591.707	34.092			Number of XY Pairs	140
203.829	53.194
402.916	25.723
196.252	35.013
595.177	36.607
485.859	38.676
283.533	20.935
1035.4	26.688
423.102	24.958
628.436	28.052
319.857	22.733
558.391	34.265
305.744	32.697
629.303	25.246
152.699	24.894
446.585	21.566
380.821	23.659
197.698	29.344
313.958	33.17
151.6	17.24
356.875	21.407
379.491	24.807
368.327	21.484
448.841	24.128
232.056	19.805
38.522	35.296
69.698	43.524
37.018	45.377
38.29	53.527
53.734	30.981
73.689	37.485
35.34	32.354
65.591	37.48
90.925	43.192
90	33.049
83.348	40.467
49.454	51.402
104.344	39.252
55.7	53.195
25.565	52.029
28.226	52.721
21.401	44.695
122.969	37.454
121.754	50.632
25.334	56.847
113.83	37.675
55.238	46.952
51.42	34.076
42.166	55.433
51.478	66.158
40.488	49.943
46.272	35.888
58.072	35.714
81.497	38.211
108.161	38.486
66.979	38.519
39.678	38.69
99.601	49.51
79.299	20.616
71.028	47.921
22.269	52.971
62.063	36.013
26.664	27.629
21.054	58.376
91.677	26.755
18.509	28.416
93.065	53.052
108.509	49.042
35.514	73.213
75.829	46.217
96.015	37.722
63.335	46.993
28.805	64.161
26.028	48.32
61.079	72.277
75.597	47.814
129.62	19.557
24.062	31.514
84.852	28.462
48.875	22.421
28.573	27.678
10.585	17.257
11.337	20.245
86.356	31.636
45.115	41.688
54.37	44.677
12.204	53.725
112.731	32.429
135.231	39.495
267.049	20.842
82.191	43.337
32.391	37.196
49.511	31.404
21.806	56.631
89.421	38.367
