# Supplementary material for: Bilateral JNK activation is a hallmark of interface surveillance and promotes elimination of aberrant cells
Source: eLife. 2023 Feb 6;12:e80809. doi: 10.7554/eLife.80809 (PMC9917460; doi:10.7554/eLife.80809)
Supplement: Figure 6—figure supplement 1—source data 2. [file elife-80809-fig6-figsupp1-data2.xlsx]

## Sheet: FigS6C
Area	wildtype interface TRE	clonal interface TRE				wildtype interface TRE	clonal interface TRE
405.808	19.664	42.388			Semilog line
509.863	15.25	37.023			Best-fit values
2299.68	23.99	26.24			Slope	2.878	-9.225
4526.99	24.79	31.738			Yintercept	14.48	56.78
250.68	21.802	31.101			95% CI (profile likelihood)
192.608	16.01	40.551			Slope	1,324 to 4,431	-12,56 to -5,891
230.957	27.859	40.249			Yintercept	11,05 to 17,92	49,40 to 64,15
1558.28	15.993	21.469			Hougaard's Measure of Skewness
1140.21	17.598	19.187			Slope	0	0
413.559	15.407	23.484			Yintercept	0	0
490.255	26.063	34.603			Goodness of Fit
208.225	20.103	44.965			Degrees of Freedom	138	138
389.786	17.984	27.495			R squared	0.08863	0.1782
203.078	27.306	25.006			Adjusted R squared	0.08202	0.1723
175.661	34.581	46.139			Sum of Squares	3242	14936
180.173	22.099	34.822			Sy.x	4.847	10.4
186.188	14.373	35.113			RMSE	4.829	10.37
169.935	27.872	38.46			AICc	446.1	660
217.306	25.164	32.135			Normality of Residuals
240.558	21.861	41.775			Kolmogorov-Smirnov (distance)	0.07515	0.0486
203.02	17.028	46.436			P value	0.05	>0,10
317.717	14.528	44.373			Passed normality test (alpha=0.05)?	Yes	Yes
169.414	21.961	27.614			P value summary	ns	ns
388.976	20.355	26.236			Covariance Matrix
274.973	16.232	20.721			Slope & Yintercept	-0.9718	-0.9718
570.364	17.771	35.467			Dependency
359.304	19.513	36.742			Slope	0.9444	0.9444
2532.19	23.108	26.936			Yintercept	0.9444	0.9444
560.705	23.595	32.49
265.256	22.22	21.392			Number of points
364.741	29.465	36.907			# of X values	140	140
151.021	18.149	30.49			# Y values analyzed	140	140
430.969	37.487	34.4
573.314	26.838	25.31
207.531	19.614	41.904				Area vs. wildtype interface TRE	Area vs. clonal interface TRE
1305.34	33.688	34.121			Spearman r
261.265	22.374	32.289			r	0.2875	-0.4353
575.107	18.823	31.406			95% confidence interval	0,1228 to 0,4368	-0,5641 to -0,2859
225.809	12.084	22.137
143.502	20.723	46.868			P value
2972.88	22.566	34.827			P (two-tailed)	<0,001	<0,001
218.926	29.721	37.456			P value summary	***	***
465.21	26.929	44.398			Exact or approximate P value?	Approximate	Approximate
332.062	21.535	45.104			Significant? (alpha = 0.05)	Yes	Yes
209.613	24.049	44.256
591.707	26.393	35.79			Number of XY Pairs	140	140
203.829	21.553	54.679
402.916	22.357	25.781
196.252	29.47	34.966
595.177	28.134	38.933
485.859	32.958	42.419
283.533	9.613	21.226
1035.4	23.945	28.579
423.102	30.394	26.649
628.436	24.511	31.292
319.857	20.128	22.816
558.391	27.672	36.734
305.744	21.858	33.451
629.303	26.509	27.721
152.699	17.137	24.894
446.585	25.657	22.263
380.821	22.253	24.273
197.698	19.889	29.059
313.958	20.83	34.19
151.6	15.428	17.505
356.875	13.729	21.756
379.491	13.878	24.648
368.327	17.732	21.483
448.841	18.193	25.339
232.056	17.282	19.795
38.522	12.848	35.296
69.698	14.4	43.524
37.018	14.376	45.377
38.29	18.845	53.527
53.734	18.046	30.981
73.689	24.429	37.485
35.34	24.287	32.354
65.591	16.735	37.48
90.925	23.514	43.192
90	22.698	33.049
83.348	17.78	40.467
49.454	24.907	51.402
104.344	22.741	39.252
55.7	19.997	53.195
25.565	18.357	52.029
28.226	15.789	52.721
21.401	22.431	44.695
122.969	12.507	37.454
121.754	19.066	50.632
25.334	25.205	56.847
113.83	18.582	37.675
55.238	20.151	46.952
51.42	21.199	34.076
42.166	16.658	55.433
51.478	14.553	66.158
40.488	21.934	49.943
46.272	19.184	35.888
58.072	15.123	35.714
81.497	28.097	38.211
108.161	22.32	38.486
66.979	15.912	38.519
39.678	18.582	38.69
99.601	28.849	49.51
79.299	20.987	20.616
71.028	20.585	47.921
22.269	19.626	52.971
62.063	19.37	36.013
26.664	15.344	27.629
21.054	17.458	58.376
91.677	15.225	26.755
18.509	26.608	28.416
93.065	15.774	53.052
108.509	18.292	49.042
35.514	18.59	73.213
75.829	24.944	46.217
96.015	18.233	37.722
63.335	23.515	46.993
28.805	17.65	64.161
26.028	17.37	48.32
61.079	22.372	72.277
75.597	20.085	47.814
129.62	16.201	19.557
24.062	15.391	31.514
84.852	31.065	28.462
48.875	21.209	22.421
28.573	10.063	27.678
10.585	16.069	17.257
11.337	20.003	20.245
86.356	15.361	31.636
45.115	20.448	41.688
54.37	21.673	44.677
12.204	16.473	53.725
112.731	23.027	32.429
135.231	17.542	39.495
267.049	14.339	20.842
82.191	17.975	43.337
32.391	16.001	37.196
49.511	16.347	31.404
21.806	20.75	56.631
89.421	17.731	38.367
