# Supplementary material for: Bilateral JNK activation is a hallmark of interface surveillance and promotes elimination of aberrant cells
Source: eLife. 2023 Feb 6;12:e80809. doi: 10.7554/eLife.80809 (PMC9917460; doi:10.7554/eLife.80809)
Supplement: Figure 6—source data 1. [file elife-80809-fig6-data1.xlsx]

## Sheet: Fig6A
10-140 µm2	140-650 µm2	650-5000 µm2
35.296	42.62	25.917
43.524	34.897	30.686
45.377	30.206	22.016
53.527	41.043	17.763
30.981	37.947	24.957
37.485	22.182	31.701
32.354	31.432	32.029
37.48	44.208	26.688
43.192	26.093
33.049	24.169
40.467	45.806
51.402	34.394
39.252	34.879
53.195	37.003
52.029	32.107
52.721	40.862
44.695	46.947
37.454	45.012
50.632	27.254
56.847	25.246
37.675	20.418
46.952	35.127
34.076	34.721
55.433	32.002
66.158	20.601
49.943	36.723
35.888	30.123
35.714	31.75
38.211	22.005
38.486	40.59
38.519	30.31
38.69	29.593
49.51	21.477
20.616	46.846
47.921	36.826
52.971	41.307
36.013	42.814
27.629	42.744
58.376	34.092
26.755	53.194
28.416	25.723
53.052	35.013
49.042	36.607
73.213	38.676
46.217	20.935
37.722	24.958
46.993	28.052
64.161	22.733
48.32	34.265
72.277	32.697
47.814	25.246
19.557	24.894
31.514	21.566
28.462	23.659
22.421	29.344
27.678	33.17
17.257	17.24
20.245	21.407
31.636	24.807
41.688	21.484
44.677	24.128
53.725	19.805
32.429	20.842
39.495
43.337
37.196
31.404
56.631
38.367
Alpha	0.05
Dunnett's T3 multiple comparisons test	Mean Diff,	95,00% CI of diff,	Below threshold?	Summary	Adjusted P Value
10-140 µm2 vs. 140-650 µm2	10.24	5,888 to 14,59	Yes	***	<0,001	A-B
10-140 µm2 vs. 650-5000 µm2	15.44	9,490 to 21,38	Yes	***	<0,001	A-C
140-650 µm2 vs. 650-5000 µm2	5.194	-0,4108 to 10,80	No	ns	0.07	B-C
Test details	Mean 1	Mean 2	Mean Diff,	SE of diff,	n1	n2	t	DF
10-140 µm2 vs. 140-650 µm2	41.9	31.66	10.24	1.799	69	63	5.693	122.5
10-140 µm2 vs. 650-5000 µm2	41.9	26.47	15.44	2.282	69	8	6.765	18.71
140-650 µm2 vs. 650-5000 µm2	31.66	26.47	5.194	2.063	63	8	2.518	12.89
