# Supplementary material for: Bilateral JNK activation is a hallmark of interface surveillance and promotes elimination of aberrant cells
Source: eLife. 2023 Feb 6;12:e80809. doi: 10.7554/eLife.80809 (PMC9917460; doi:10.7554/eLife.80809)
Supplement: Figure 6—source data 2. [file elife-80809-fig6-data2.xlsx]

## Sheet: Fig6B
10-140 µm2	140-650 µm2	650-5000 µm2
35.296	42.388	26.24
43.524	37.023	31.738
45.377	31.101	21.469
53.527	40.551	19.187
30.981	40.249	26.936
37.485	23.484	34.121
32.354	34.603	34.827
37.48	44.965	28.579
43.192	27.495
33.049	25.006
40.467	46.139
51.402	34.822
39.252	35.113
53.195	38.46
52.029	32.135
52.721	41.775
44.695	46.436
37.454	44.373
50.632	27.614
56.847	26.236
37.675	20.721
46.952	35.467
34.076	36.742
55.433	32.49
66.158	21.392
49.943	36.907
35.888	30.49
35.714	34.4
38.211	25.31
38.486	41.904
38.519	32.289
38.69	31.406
49.51	22.137
20.616	46.868
47.921	37.456
52.971	44.398
36.013	45.104
27.629	44.256
58.376	35.79
26.755	54.679
28.416	25.781
53.052	34.966
49.042	38.933
73.213	42.419
46.217	21.226
37.722	26.649
46.993	31.292
64.161	22.816
48.32	36.734
72.277	33.451
47.814	27.721
19.557	24.894
31.514	22.263
28.462	24.273
22.421	29.059
27.678	34.19
17.257	17.505
20.245	21.756
31.636	24.648
41.688	21.483
44.677	25.339
53.725	19.795
32.429	20.842
39.495
43.337
37.196
31.404
56.631
38.367
Alpha	0.05
Dunnett's T3 multiple comparisons test	Mean Diff,	95,00% CI of diff,	Below threshold?	Summary	Adjusted P Value
10-140 µm2 vs. 140-650 µm2	9.235	4,855 to 13,62	Yes	***	<0,001	A-B
10-140 µm2 vs. 650-5000 µm2	14.02	7,488 to 20,55	Yes	***	<0,001	A-C
140-650 µm2 vs. 650-5000 µm2	4.783	-1,460 to 11,03	No	ns	0.15	B-C
Test details	Mean 1	Mean 2	Mean Diff,	SE of diff,	n1	n2	t	DF
10-140 µm2 vs. 140-650 µm2	41.9	32.67	9.235	1.81	69	63	5.101	123.4
10-140 µm2 vs. 650-5000 µm2	41.9	27.89	14.02	2.464	69	8	5.689	15.85
140-650 µm2 vs. 650-5000 µm2	32.67	27.89	4.783	2.272	63	8	2.105	11.67
