# Supplementary material for: Bilateral JNK activation is a hallmark of interface surveillance and promotes elimination of aberrant cells
Source: eLife. 2023 Feb 6;12:e80809. doi: 10.7554/eLife.80809 (PMC9917460; doi:10.7554/eLife.80809)
Supplement: Figure 6—source data 3. [file elife-80809-fig6-data3.xlsx]

## Sheet: Fig6C
10-140 µm2	140-650 µm2	650-5000 µm2
12.848	19.664	23.99
14.4	15.25	24.79
14.376	21.802	15.993
18.845	16.01	17.598
18.046	27.859	23.108
24.429	15.407	33.688
24.287	26.063	22.566
16.735	20.103	23.945
23.514	17.984
22.698	27.306
17.78	34.581
24.907	22.099
22.741	14.373
19.997	27.872
18.357	25.164
15.789	21.861
22.431	17.028
12.507	14.528
19.066	21.961
25.205	20.355
18.582	16.232
20.151	17.771
21.199	19.513
16.658	23.595
14.553	22.22
21.934	29.465
19.184	18.149
15.123	37.487
28.097	26.838
22.32	19.614
15.912	22.374
18.582	18.823
28.849	12.084
20.987	20.723
20.585	29.721
19.626	26.929
19.37	21.535
15.344	24.049
17.458	26.393
15.225	21.553
26.608	22.357
15.774	29.47
18.292	28.134
18.59	32.958
24.944	9.613
18.233	30.394
23.515	24.511
17.65	20.128
17.37	27.672
22.372	21.858
20.085	26.509
16.201	17.137
15.391	25.657
31.065	22.253
21.209	19.889
10.063	20.83
16.069	15.428
20.003	13.729
15.361	13.878
20.448	17.732
21.673	18.193
16.473	17.282
23.027	14.339
17.542
17.975
16.001
16.347
20.75
17.731
Alpha	0.05
Dunnett's T3 multiple comparisons test	Mean Diff,	95,00% CI of diff,	Below threshold?	Summary	Adjusted P Value
10-140 µm2 vs. 140-650 µm2	-2.428	-4,526 to -0,3298	Yes	*	0.02	A-B
10-140 µm2 vs. 650-5000 µm2	-3.855	-9,589 to 1,879	No	ns	0.21	A-C
140-650 µm2 vs. 650-5000 µm2	-1.427	-7,229 to 4,374	No	ns	0.86	B-C
Test details	Mean 1	Mean 2	Mean Diff,	SE of diff,	n1	n2	t	DF
10-140 µm2 vs. 140-650 µm2	19.35	21.78	-2.428	0.8658	69	63	2.804	109.9
10-140 µm2 vs. 650-5000 µm2	19.35	23.21	-3.855	1.938	69	8	1.989	7.948
140-650 µm2 vs. 650-5000 µm2	21.78	23.21	-1.427	2.011	63	8	0.7099	9.184
