# Supplementary material for: Bilateral JNK activation is a hallmark of interface surveillance and promotes elimination of aberrant cells
Source: eLife. 2023 Feb 6;12:e80809. doi: 10.7554/eLife.80809 (PMC9917460; doi:10.7554/eLife.80809)
Supplement: Figure 6—source data 4. [file elife-80809-fig6-data4.xlsx]

## Sheet: Fig6E
Clone area	Percentage cDcp1 area
28.226	0
84.852	0
313.958	0
51.42	0
35.34	0
53.734	0
10.585	0
42.166	0
48.875	0
11.337	0
250.68	0
38.29	0
380.821	0.014
197.698	0.027
152.699	0.031
208.225	0.031
207.531	0.032
186.188	0.033
49.511	0.05
86.356	0.051
180.173	0.082
61.079	0.087
73.689	0.097
99.601	0.102
96.015	0.179
359.304	0.231
63.335	0.252
509.863	0.628
595.177	0.63
192.608	0.843
90	1.548
169.414	2.162
230.957	2.229
332.062	2.985
465.21	3.157
591.707	3.162
490.255	3.853
240.558	4.252
90.925	4.979
261.265	5.253
26.664	5.28
175.661	5.372
405.808	5.499
135.231	6.522
38.522	6.847
112.731	8.181
485.859	9.013
570.364	9.071
37.018	10.058
55.238	11.566
122.969	12.078
45.115	12.565
113.83	14.286
82.191	15.667
209.613	15.676
69.698	15.699
32.391	15.856
317.717	16.195
21.806	17.206
203.02	17.349
93.065	17.574
75.829	18.744
108.509	20.431
267.049	22.439
49.454	22.659
104.344	22.71
40.488	22.996
75.597	23.235
83.348	25.403
54.37	25.754
25.565	26.918
65.591	27.056
203.829	27.635
21.054	30.918
26.028	31.878
55.7	33.481
71.028	39.235
38.522	49.448
121.754	50.126
35.514	50.371
46.272	53.783
21.401	57.426
25.334	59.801
51.478	62.014
12.204	74.23
22.269	75.872
28.805	86.012
