# Supplementary material for: Bilateral JNK activation is a hallmark of interface surveillance and promotes elimination of aberrant cells
Source: eLife. 2023 Feb 6;12:e80809. doi: 10.7554/eLife.80809 (PMC9917460; doi:10.7554/eLife.80809)
Supplement: Figure 6—source data 5. [file elife-80809-fig6-data5.xlsx]

## Sheet: Fig6F
Clone area	Percentage cDcp1 area
28.226	0
84.852	0
313.958	0.0140502
51.42	0.0289648
35.34	0.0314246
53.734	0.0636471
10.585	0.0640944
42.166	0.0677768
48.875	0.072245
11.337	0.119995
250.68	0.755439
38.29	0.948656
380.821	0.0326136
197.698	0.0157543
152.699	0.0574758
208.225	1.14675
207.531	0.058618
186.188	0.795509
49.511	0.0767615
86.356	0
180.173	0.207193
61.079	0.352202
73.689	0.0968887
99.601	0.0246499
96.015	0.0549758
359.304	0.0536146
63.335	0.0608655
509.863	0.179507
595.177	0.64588
192.608	0.0725345
90	1.17589
169.414	0.428678
230.957	0.0324308
332.062	6.09238
465.21	2.74022
591.707	3.12261
490.255	0.0120873
240.558	2.02767
90.925	1.31156
261.265	0.775696
26.664	1.94525
175.661	0.168618
405.808	2.15962
135.231	0.0194371
38.522	0.057399
112.731	0.410815
485.859	0.977355
570.364	1.70436
37.018	2.64351
55.238	1.13646
122.969	2.67456
45.115	0.872774
113.83	5.25416
82.191	3.06378
209.613	0.835827
69.698	17.5102
32.391	0
317.717	1.24944
21.806	0.631469
203.02	5.90388
93.065	5.16944
75.829	2.80121
108.509	6.84798
267.049	5.33259
49.454	4.45041
104.344	1.73294
40.488	5.2232
75.597	11.5464
83.348	12.0781
54.37	1.47788
25.565	8.95593
65.591	1.96282
203.829	5.93108
21.054	7.21518
26.028	21.7648
55.7	12.4138
71.028	1.42527
38.522	15.7023
121.754	3.65642
35.514	2.19605
46.272	12.9738
21.401	11.4868
25.334	3.29704
51.478	1.9445
12.204	6.56754
22.269	4.99969
28.805	19.742
