# Supplementary material for: Bilateral JNK activation is a hallmark of interface surveillance and promotes elimination of aberrant cells
Source: eLife. 2023 Feb 6;12:e80809. doi: 10.7554/eLife.80809 (PMC9917460; doi:10.7554/eLife.80809)
Supplement: Figure 6—source data 6. [file elife-80809-fig6-data6.xlsx]

## Sheet: Fig6G
Clonal interface 10-140	WT interface 10-140
0	0
0	0
0	0.0289648
0	0.0314246
0	0.0636471
0	0.0640944
0	0.0677768
0	0.072245
0	0.119995
0	0.948656
0.05	0.0767615
0.051	0
0.087	0.352202
0.097	0.0968887
0.102	0.0246499
0.179	0.0549758
0.252	0.0608655
1.548	1.17589
4.979	1.31156
5.28	1.94525
6.522	0.0194371
6.847	0.057399
8.181	0.410815
10.058	2.64351
11.566	1.13646
12.078	2.67456
12.565	0.872774
14.286	5.25416
15.667	3.06378
15.699	17.5102
15.856	0
17.206	0.631469
17.574	5.16944
18.744	2.80121
20.431	6.84798
22.659	4.45041
22.71	1.73294
22.996	5.2232
23.235	11.5464
25.403	12.0781
25.754	1.47788
26.918	8.95593
27.056	1.96282
30.918	7.21518
31.878	21.7648
33.481	12.4138
39.235	1.42527
49.448	15.7023
50.126	3.65642
50.371	2.19605
53.783	12.9738
57.426	11.4868
59.801	3.29704
62.014	1.9445
74.23	6.56754
75.872	4.99969
86.012	19.742
Column B	WT interface 10-140
vs.	vs,
Column A	Clonal interface 10-140
Paired t test
P value	<0,001
P value summary	***
Significantly different (P < 0.05)?	Yes
One- or two-tailed P value?	Two-tailed
t, df	t=6,255, df=56
Number of pairs	57
