# Supplementary material for: Bilateral JNK activation is a hallmark of interface surveillance and promotes elimination of aberrant cells
Source: eLife. 2023 Feb 6;12:e80809. doi: 10.7554/eLife.80809 (PMC9917460; doi:10.7554/eLife.80809)
Supplement: Figure 7—figure supplement 1—source data 1. [file elife-80809-fig7-figsupp1-data1.xlsx]

## Sheet: FigS7E-fkh
Quantifications of nuclear miniCic intensity (AU) in clones expressing fkh versus nuclear miniCic intensity (AU) in corresponding wildtype interface cells
UAS-Fkh	Wildtype interface
60.029	42.637
47.93	39.501
51.58	42.685
47.39	39.058
43.779	35.375
47.356	34.097
47.403	44.63
45.033	36.693
52.211	38.175
53.215	39.751
38.314	36.675
34.1	38.798
41.757	37.354
42.555	27.198
33.452	36.772
40.279	28.221
32.218	29.043
34.234	25.092
35.481	32.479
29.186	30.434
39.347	27.282
37.003	26.282
39.592	34.543
52.004	26.932
54.775	36.22
miniCic localization was studied in discs with ras, fkh or fkh,ras clones in at least 4 independent experiments.
Those wing discs with sufficient spacing between clones, where an outer interface around clones could be drawn without encroaching into other clones, were included for this analysis.
The Ras, fkh and fkh,Ras wing discs in S6.1E were all from the same experiment.
Paired t test
P value	<0.001
P value summary	***
Significantly different (P < 0.05)?	Yes
One- or two-tailed P value?	Two-tailed
t, df	t=6.095, df=24
Number of pairs	25
	UAS-Fkh	Wildtype interface	Wildtype interface - UAS-Fkh
Number of values	25	25	25
Minimum	29.19	25.09	-25.07
25% Percentile	36.24	28.63	-13.36
Median	42.56	36.22	-8.429
75% Percentile	49.76	38.93	-3.089
Maximum	60.03	44.63	4.698
Mean	43.21	34.64	-8.572
Std. Deviation	8.065	5.686	7.032
Std. Error of Mean	1.613	1.137	1.406
Lower 95% CI	39.88	32.29	-11.47
Upper 95% CI	46.54	36.98	-5.669
