# Supplementary material for: Bilateral JNK activation is a hallmark of interface surveillance and promotes elimination of aberrant cells
Source: eLife. 2023 Feb 6;12:e80809. doi: 10.7554/eLife.80809 (PMC9917460; doi:10.7554/eLife.80809)
Supplement: Figure 7—figure supplement 1—source data 2. [file elife-80809-fig7-figsupp1-data2.xlsx]

## Sheet: FigS7E-fkh+Ras
UAS-Fkh;UAS-RasV12	Wildtype interface
26.24	24.869
24.23	21.587
18.715	18.186
25.482	22.702
26.974	22.938
27.206	23.087
26.882	23.103
27.307	22.776
29.181	24.73
30.15	24.016
20.396	19.964
13.459	25.122
13.376	20.727
13.444	24.703
16.455	17.295
16.483	22.525
13.294	19.126
9.281	19.051
16.455	17.295
18.502	35.503
15.283	33.378
20.469	33.714
17.886	34.293
19.179	39.856
15.471	30.462
miniCic localization was studied in discs with ras, fkh or fkh,ras clones in at least 4 independent experiments.
Those wing discs with sufficient spacing between clones, where an outer interface around clones could be drawn without encroaching into other clones, were included for this analysis.
The Ras, fkh and fkh,Ras wingdiscs in S6.1E were all from the same experiment.
Table Analyzed	fkh ras clones
Column B	Wildtype interface
vs.	vs.
Column A	UAS-Fkh;UAS-RasV12
Paired t test
P value	0.01
P value summary	*
Significantly different (P < 0.05)?	Yes
One- or two-tailed P value?	Two-tailed
t, df	t=2.775, df=24
Number of pairs	25
	UAS-Fkh;UAS-RasV12	Wildtype interface	Wildtype interface - UAS-Fkh;UAS-RasV12
Number of values	25	25	25
Minimum	9.281	17.3	-6.134
25% Percentile	15.38	20.35	-3.28
Median	18.72	23.09	0.84
75% Percentile	26.56	27.79	12.45
Maximum	30.15	39.86	20.68
Mean	20.07	24.84	4.768
Std. Deviation	5.967	6.165	8.592
Std. Error of Mean	1.193	1.233	1.718
Lower 95% CI	17.61	22.3	1.222
Upper 95% CI	22.54	27.38	8.315
