# Supplementary material for: Bilateral JNK activation is a hallmark of interface surveillance and promotes elimination of aberrant cells
Source: eLife. 2023 Feb 6;12:e80809. doi: 10.7554/eLife.80809 (PMC9917460; doi:10.7554/eLife.80809)
Supplement: Figure 7—figure supplement 1—source data 3. [file elife-80809-fig7-figsupp1-data3.xlsx]

## Sheet: FigS7E-Ras
Quantifications of nuclear miniCic intensity (AU) in clones expressing RasV12 versus nuclear miniCic intensity (AU) in corresponding wildtype interface cells
UAS-RasV12	Wildtype interface
20.619	45.983
19.604	35.885
19.26	36.712
19.068	37.905
16.182	32.189
14.351	36.282
18.367	40.436
miniCic localization was studied in discs with ras, fkh or fkh,ras clones in at least 4 independent experiments.
Those wing discs with sufficient spacing between clones, where an outer interface around clones could be drawn without encroaching into other clones, were included for this analysis.
The Ras, fkh and fkh,Ras wing discs in S6.1E were all from the same experiment.
Column B	Wildtype interface
vs.	vs.
Column A	UAS-RasV12
Paired t test
P value	<0.001
P value summary	***
Significantly different (P < 0.05)?	Yes
One- or two-tailed P value?	Two-tailed
t, df	t=14.87, df=6
Number of pairs	7
	UAS-RasV12	Wildtype interface	Wildtype interface - UAS-RasV12
Number of values	7	7	7
Minimum	14.35	32.19	16.01
25% Percentile	16.18	35.89	16.28
Median	19.07	36.71	18.84
75% Percentile	19.6	40.44	22.07
Maximum	20.62	45.98	25.36
Mean	18.21	37.91	19.71
Std. Deviation	2.184	4.33	3.507
Std. Error of Mean	0.8254	1.636	1.326
Lower 95% CI	16.19	33.91	16.46
Upper 95% CI	20.23	41.92	22.95
