# Supplementary material for: Bilateral JNK activation is a hallmark of interface surveillance and promotes elimination of aberrant cells
Source: eLife. 2023 Feb 6;12:e80809. doi: 10.7554/eLife.80809 (PMC9917460; doi:10.7554/eLife.80809)
Supplement: Figure 7—source data 1. [file elife-80809-fig7-data1.xlsx]

## Sheet: Fig7G
	Comparison of percentage apoptotic area in clones of different genotypes: GFP, RasV12, fkh, Fkh RasV12
	GFP	RasV12	fkh	fkh RasV12
wing disc1	0.00144154	0.708696	4.60623	0.268287
wing disc2	0.00484937	0.110583	2.58564	0.209498
wing disc3	0.0144453	0.553397	5.119	0.0754525
wing disc4	0.00291423	0.302743	5.88403	0.0134463
wing disc5	0.00139073	0.0439455	3.11651	0.252016
Apoptosis was studied in discs with GFP, Ras, fkh or fkh Ras clones in at least 3 independent experiments per genotype.
For the purpose of quantification, the experiment was performed once with all genotypes imaged together, with 5 wing discs per genotype.
Alpha	0.05
Tukey's multiple comparisons test	Mean Diff,	95,00% CI of diff,	Below threshold?	Summary	Adjusted P Value
GFP vs. RasV12	-0.3389	-1,617 to 0,9391	No	ns	0.87	A-B
GFP vs. fkh	-4.257	-5,535 to -2,979	Yes	***	<0,001	A-C
GFP vs. fkh RasV12	-0.1587	-1,437 to 1,119	No	ns	0.98	A-D
RasV12 vs. fkh	-3.918	-5,196 to -2,640	Yes	***	<0,001	B-C
RasV12 vs. fkh RasV12	0.1801	-1,098 to 1,458	No	ns	0.98	B-D
fkh vs. fkh RasV12	4.099	2,821 to 5,376	Yes	***	<0,001	C-D
Test details	Mean 1	Mean 2	Mean Diff,	SE of diff,	n1	n2	q	DF
GFP vs. RasV12	0.005008	0.3439	-0.3389	0.4467	5	5	1.073	16
GFP vs. fkh	0.005008	4.262	-4.257	0.4467	5	5	13.48	16
GFP vs. fkh RasV12	0.005008	0.1637	-0.1587	0.4467	5	5	0.5026	16
RasV12 vs. fkh	0.3439	4.262	-3.918	0.4467	5	5	12.41	16
RasV12 vs. fkh RasV12	0.3439	0.1637	0.1801	0.4467	5	5	0.5703	16
fkh vs. fkh RasV12	4.262	0.1637	4.099	0.4467	5	5	12.98	16
	GFP	RasV12	fkh	fkh RasV12
Number of values	5	5	5	5
Minimum	0.001391	0.04395	2.586	0.01345
25% Percentile	0.001416	0.07726	2.851	0.04445
Median	0.002914	0.3027	4.606	0.2095
75% Percentile	0.009647	0.631	5.502	0.2602
Maximum	0.01445	0.7087	5.884	0.2683
Mean	0.005008	0.3439	4.262	0.1637
Std. Deviation	0.005461	0.2842	1.379	0.1131
Std. Error of Mean	0.002442	0.1271	0.6167	0.0506
Lower 95% CI	-0.001772	-0.009003	2.55	0.02326
Upper 95% CI	0.01179	0.6967	5.975	0.3042
